# Supplementary material for: Chimpanzees (Pan troglodytes) display limited behavioural flexibility when faced with a changing foraging task requiring tool use
Source: PeerJ. 2018 Feb 19;6:e4366. doi: 10.7717/peerj.4366 (PMC5822838; doi:10.7717/peerj.4366)
Supplement: Data S1 — Data provided includes Session, Phase (1 to 3; Wide to Narrow Scaffolded), Individual, Material (tool material), Action (technique attempted), Success, and ‘Always effective’ technique (yes or no). [file peerj-06-4366-s002.xlsx]

## Sheet: Sheet1
Session	Phase	CumulativeTime	Individual	Material	Action	Success	AlwaysEffective?
1	1	00:00:35	EV	HAND	HAND DIP	YES	No
1	1	00:00:43	KN	STICK	STICK DIP	YES	No
1	1	00:01:14	EV	STICK	retrieve	YES	No
1	1	00:01:20	EV	HAND	HAND DIP	YES	No
1	1	00:01:39	ED	HAND	HAND DIP	YES	No
1	1	00:01:46	EV	HAND	HAND DIP	YES	No
1	1	00:02:22	EV	HAND	HAND DIP	YES	No
1	1	00:03:18	EV	HAND	HAND DIP	YES	No
1	1	00:03:26	EV	HAND	HAND DIP	YES	No
1	1	00:04:14	EV	HAND	HAND DIP	YES	No
1	1	00:04:17	EV	HAND	HAND DIP	YES	No
1	1	00:04:20	EV	HAND	HAND DIP	YES	No
1	1	00:04:22	EV	HAND	HAND DIP	YES	No
1	1	00:04:43	EV	HAND	HAND DIP	YES	No
1	1	00:05:05	PE	HAND	HAND DIP	YES	No
1	1	00:05:10	EV	HAND	HAND DIP	YES	No
1	1	00:05:15	EV	HAND	HAND DIP	YES	No
1	1	00:05:20	EV	HAND	HAND DIP	YES	No
1	1	00:05:24	EV	HAND	HAND DIP	YES	No
1	1	00:05:28	EV	HAND	HAND DIP	YES	No
1	1	00:05:30	EV	HAND	HAND DIP	YES	No
1	1	00:06:06	EM	HAND	HAND DIP	UNKNOWN	No
1	1	00:06:20	KL	STICK	STICK DIP	NO	No
1	1	00:06:28	KL	HAND	HAND DIP	YES	No
1	1	00:06:41	KL	STICK	STICK DIP	NO	No
1	1	00:06:48	KL	HAND	HAND DIP	YES	No
1	1	00:07:03	PE	STICK	STICK DIP	NO	No
1	1	00:07:20	KL	STICK	STICK DIP	YES	No
1	1	00:07:22	RE	STICK	STICK DIP	NO	No
1	1	00:07:40	KL	STICK	STICK DIP	YES	No
1	1	00:07:52	KL	STICK	STICK DIP	YES	No
1	1	00:07:54	KL	STICK	STICK DIP	YES	No
1	1	00:07:59	KL	STICK	STICK DIP	YES	No
1	1	00:08:04	KL	STICK	STICK DIP	YES	No
1	1	00:08:10	KL	STICK	STICK DIP	YES	No
1	1	00:08:14	KL	STICK	STICK DIP	YES	No
1	1	00:08:24	KL	STICK	STICK DIP	YES	No
1	1	00:08:28	KL	STICK	STICK DIP	YES	No
1	1	00:08:33	KL	STICK	STICK DIP	YES	No
1	1	00:08:37	KL	STICK	retrieve	YES	No
1	1	00:08:50	KL	STICK	STICK DIP	YES	No
1	1	00:09:10	RE	STICK	STICK DIP	NO	No
1	1	00:09:15	RE	HAND	HAND DIP	NO	No
1	1	00:09:23	KL	STICK	STICK DIP	NO	No
1	1	00:09:30	KL	STICK	STICK DIP	YES	No
1	1	00:09:39	KL	STICK	STICK DIP	YES	No
1	1	00:09:46	KL	STICK	STICK DIP	YES	No
1	1	00:09:49	KL	STICK	STICK DIP	YES	No
1	1	00:09:54	KL	STICK	STICK DIP	YES	No
1	1	00:10:02	KL	HAND	HAND DIP	YES	No
1	1	00:10:08	KL	HAND	HAND DIP	YES	No
1	1	00:10:14	KL	STICK	STICK DIP	NO	No
1	1	00:10:42	KL	STICK	STICK DIP	NO	No
1	1	00:10:49	KN	STICK	STICK DIP	YES	No
1	1	00:10:55	KN	STICK	STICK DIP	NO	No
1	1	00:11:10	PE	STICK	retrieve	YES	No
1	1	00:11:15	PE	STICK	STICK DIP	YES	No
1	1	00:11:19	PE	STICK	STICK DIP	YES	No
1	1	00:11:25	PE	STICK	STICK DIP	YES	No
1	1	00:11:36	PE	STICK	STICK DIP	NO	No
1	1	00:11:37	ED	STICK	STICK DIP	NO	No
1	1	00:11:55	PE	STICK	retrieve	YES	No
1	1	00:12:02	PE	STICK	STICK DIP	YES	No
1	1	00:12:11	PE	STICK	STICK DIP	YES	No
1	1	00:12:15	PE	STICK	STICK DIP	YES	No
1	1	00:12:20	PE	STICK	STICK DIP	YES	No
1	1	00:12:24	PE	STICK	STICK DIP	YES	No
1	1	00:12:29	PE	STICK	STICK DIP	YES	No
1	1	00:12:38	PE	STICK	STICK DIP	YES	No
1	1	00:12:42	PE	STICK	STICK DIP	YES	No
1	1	00:12:56	PE	STICK	STICK DIP	YES	No
1	1	00:13:06	PE	STICK	STICK DIP	YES	No
1	1	00:13:26	PE	STICK	STICK DIP	YES	No
1	1	00:13:30	PE	STICK	STICK DIP	YES	No
1	1	00:13:33	PE	STICK	STICK DIP	YES	No
1	1	00:13:43	PE	STICK	STICK DIP	YES	No
1	1	00:13:47	PE	STICK	STICK DIP	YES	No
1	1	00:13:53	PE	STICK	STICK DIP	YES	No
1	1	00:13:56	PE	STICK	STICK DIP	YES	No
1	1	00:14:01	PE	STICK	STICK DIP	YES	No
1	1	00:14:05	PE	STICK	STICK DIP	YES	No
1	1	00:14:09	PE	STICK	STICK DIP	YES	No
1	1	00:14:12	PE	STICK	STICK DIP	YES	No
1	1	00:14:17	PE	STICK	STICK DIP	YES	No
1	1	00:14:24	PE	STICK	STICK DIP	YES	No
1	1	00:14:30	PE	STICK	STICK DIP	YES	No
1	1	00:14:36	PE	STICK	STICK DIP	YES	No
1	1	00:14:44	PE	STICK	STICK DIP	YES	No
1	1	00:15:15	PE	STICK	STICK DIP	YES	No
1	1	00:15:18	PE	STICK	STICK DIP	YES	No
1	1	00:15:23	PE	STICK	STICK DIP	YES	No
1	1	00:15:27	PE	STICK	STICK DIP	YES	No
1	1	00:15:34	PE	STICK	STICK DIP	YES	No
1	1	00:15:44	EV	STICK	retrieve	YES	No
1	1	00:15:47	PE	HAND	HAND DIP	YES	No
1	1	00:15:50	PE	HAND	HAND DIP	YES	No
1	1	00:15:53	RE	HAND	HAND DIP	UNKNOWN	No
1	1	00:16:00	RE	STICK	STICK DIP	NO	No
1	1	00:16:08	RE	HAND	HAND DIP	YES	No
1	1	00:16:13	RE	HAND	HAND DIP	YES	No
1	1	00:16:16	RE	HAND	HAND DIP	YES	No
1	1	00:16:18	RE	HAND	HAND DIP	YES	No
1	1	00:16:20	RE	HAND	HAND DIP	YES	No
1	1	00:16:24	RE	STICK	STICK DIP	YES	No
1	1	00:16:33	RE	HAND	HAND DIP	YES	No
1	1	00:16:34	RE	HAND	HAND DIP	YES	No
1	1	00:16:37	RE	HAND	HAND DIP	YES	No
1	1	00:16:40	RE	HAND	HAND DIP	YES	No
1	1	00:16:45	RE	HAND	HAND DIP	YES	No
1	1	00:16:49	RE	HAND	HAND DIP	YES	No
1	1	00:16:51	RE	HAND	HAND DIP	YES	No
1	1	00:16:53	RE	HAND	HAND DIP	YES	No
1	1	00:16:54	RE	HAND	HAND DIP	YES	No
1	1	00:16:57	RE	HAND	HAND DIP	YES	No
1	1	00:16:59	RE	HAND	HAND DIP	YES	No
1	1	00:17:00	RE	HAND	HAND DIP	YES	No
1	1	00:17:02	RE	HAND	HAND DIP	YES	No
1	1	00:17:04	RE	HAND	HAND DIP	YES	No
1	1	00:17:06	RE	HAND	HAND DIP	YES	No
1	1	00:17:07	RE	HAND	HAND DIP	YES	No
1	1	00:17:09	RE	HAND	HAND DIP	YES	No
1	1	00:17:11	RE	HAND	HAND DIP	YES	No
1	1	00:17:14	RE	HAND	HAND DIP	YES	No
1	1	00:17:16	RE	HAND	HAND DIP	YES	No
1	1	00:17:18	RE	HAND	HAND DIP	YES	No
1	1	00:17:20	RE	HAND	HAND DIP	YES	No
1	1	00:17:22	RE	HAND	HAND DIP	YES	No
1	1	00:17:23	RE	HAND	HAND DIP	YES	No
1	1	00:17:25	RE	HAND	HAND DIP	YES	No
1	1	00:17:27	RE	HAND	HAND DIP	YES	No
1	1	00:17:29	RE	HAND	HAND DIP	YES	No
1	1	00:17:31	RE	HAND	HAND DIP	YES	No
1	1	00:17:32	RE	HAND	HAND DIP	YES	No
1	1	00:17:34	RE	HAND	HAND DIP	YES	No
1	1	00:17:36	RE	HAND	HAND DIP	YES	No
1	1	00:17:38	RE	HAND	HAND DIP	YES	No
1	1	00:17:40	RE	HAND	HAND DIP	YES	No
1	1	00:17:42	RE	HAND	HAND DIP	YES	No
1	1	00:17:43	RE	HAND	HAND DIP	YES	No
1	1	00:17:45	RE	HAND	HAND DIP	YES	No
1	1	00:17:48	RE	HAND	HAND DIP	YES	No
1	1	00:17:50	RE	HAND	HAND DIP	YES	No
1	1	00:17:53	RE	HAND	HAND DIP	YES	No
1	1	00:17:54	RE	HAND	HAND DIP	YES	No
1	1	00:17:56	RE	HAND	HAND DIP	YES	No
1	1	00:17:58	RE	HAND	HAND DIP	YES	No
1	1	00:17:59	RE	HAND	HAND DIP	YES	No
1	1	00:18:02	RE	HAND	HAND DIP	YES	No
1	1	00:18:04	RE	HAND	HAND DIP	YES	No
1	1	00:18:07	RE	HAND	HAND DIP	YES	No
1	1	00:18:08	RE	HAND	HAND DIP	YES	No
1	1	00:18:10	RE	HAND	HAND DIP	YES	No
1	1	00:18:12	RE	HAND	HAND DIP	YES	No
1	1	00:18:14	RE	HAND	HAND DIP	YES	No
1	1	00:18:15	RE	HAND	HAND DIP	YES	No
1	1	00:18:18	RE	HAND	HAND DIP	YES	No
1	1	00:18:19	RE	HAND	HAND DIP	YES	No
1	1	00:18:20	RE	HAND	HAND DIP	YES	No
1	1	00:18:22	RE	HAND	HAND DIP	YES	No
1	1	00:18:27	RE	HAND	HAND DIP	YES	No
1	1	00:18:28	RE	HAND	HAND DIP	YES	No
1	1	00:18:31	RE	HAND	HAND DIP	YES	No
1	1	00:18:34	RE	HAND	HAND DIP	YES	No
1	1	00:18:36	RE	HAND	HAND DIP	YES	No
1	1	00:18:39	RE	HAND	HAND DIP	YES	No
1	1	00:18:42	RE	HAND	HAND DIP	YES	No
1	1	00:18:45	RE	HAND	HAND DIP	YES	No
1	1	00:18:49	RE	HAND	HAND DIP	YES	No
1	1	00:18:53	RE	HAND	HAND DIP	YES	No
1	1	00:18:58	RE	HAND	HAND DIP	YES	No
1	1	00:19:01	RE	HAND	HAND DIP	YES	No
1	1	00:19:04	RE	HAND	HAND DIP	YES	No
1	1	00:19:07	RE	HAND	HAND DIP	YES	No
1	1	00:19:09	RE	HAND	HAND DIP	YES	No
1	1	00:19:11	RE	HAND	HAND DIP	YES	No
1	1	00:19:17	RE	HAND	HAND DIP	YES	No
1	1	00:19:19	RE	HAND	HAND DIP	YES	No
1	1	00:19:22	RE	HAND	HAND DIP	YES	No
1	1	00:19:25	RE	HAND	HAND DIP	YES	No
1	1	00:19:28	RE	HAND	HAND DIP	YES	No
1	1	00:19:32	RE	HAND	HAND DIP	YES	No
1	1	00:19:35	RE	HAND	HAND DIP	YES	No
1	1	00:19:38	RE	HAND	HAND DIP	YES	No
1	1	00:19:41	RE	HAND	HAND DIP	YES	No
1	1	00:19:44	RE	HAND	HAND DIP	YES	No
1	1	00:19:58	RE	STICK	STICK DIP	YES	No
1	1	00:20:04	PE	STICK	STICK DIP	YES	No
1	1	00:20:12	PE	STICK	STICK DIP	YES	No
1	1	00:20:20	PE	STICK	STICK DIP	YES	No
1	1	00:20:35	PE	STICK	STICK DIP	YES	No
1	1	00:20:42	RE	HAND	HAND DIP	YES	No
1	1	00:20:45	RE	HAND	HAND DIP	YES	No
1	1	00:20:49	RE	HAND	HAND DIP	YES	No
1	1	00:20:51	RE	HAND	HAND DIP	YES	No
1	1	00:20:54	RE	HAND	HAND DIP	YES	No
1	1	00:20:59	RE	HAND	HAND DIP	YES	No
1	1	00:21:16	PE	STICK	STICK DIP	YES	No
1	1	00:21:20	PE	STICK	STICK DIP	YES	No
1	1	00:21:23	PE	STICK	STICK DIP	YES	No
1	1	00:21:26	PE	STICK	STICK DIP	YES	No
1	1	00:21:31	PE	STICK	STICK DIP	YES	No
1	1	00:21:37	RE	STICK	STICK DIP	NO	No
1	1	00:21:39	PE	STICK	STICK DIP	YES	No
1	1	00:21:45	RE	STICK	STICK DROP	UNKNOWN	Yes
1	1	00:21:51	RE	HAND	HAND DIP	YES	No
1	1	00:21:52	RE	HAND	HAND DIP	YES	No
1	1	00:21:58	RE	HAND	HAND DIP	YES	No
1	1	00:22:06	PE	STICK	STICK DIP	YES	No
1	1	00:22:17	PE	STICK	STICK DIP	YES	No
1	1	00:22:30	PE	STICK	STICK DIP	YES	No
1	1	00:22:40	PE	STICK	STICK DIP	YES	No
1	1	00:22:56	PE	HAND	HAND DIP	NO	No
1	1	00:23:13	PE	HAND	HAND DIP	YES	No
1	1	00:23:16	PE	HAND	HAND DIP	YES	No
1	1	00:23:28	PE	STICK	STICK DIP	NO	No
1	1	00:23:38	EV	STICK	retrieve	NO	No
1	1	00:23:56	EV	STICK	STICK DIP	YES	No
1	1	00:25:14	EV	STICK	STICK DIP	NO	No
1	1	00:25:53	EV	STICK	STICK DIP	YES	No
1	1	00:26:42	EV	STICK	retrieve	YES	No
1	1	00:26:56	EV	STICK	STICK DIP	YES	No
1	1	00:27:01	EV	HAND	HAND DIP	YES	No
1	1	00:27:06	EV	HAND	HAND DIP	YES	No
1	1	00:27:08	EV	HAND	HAND DIP	YES	No
1	1	00:27:29	EV	STICK	STICK DIP	YES	No
1	1	00:29:40	ED	STICK	STICK DIP	NO	No
1	1	00:29:50	EV	STICK	retrieve	NO	No
1	1	00:32:15	EV	STICK	STICK DIP	YES	No
1	1	00:32:34	EV	STICK	STICK DIP	NO	No
1	1	00:33:10	EV	STICK	STICK DIP	YES	No
1	1	00:33:20	EV	STICK	STICK DIP	YES	No
1	1	00:34:03	ED	STICK	STICK DIP	YES	No
1	1	00:34:17	ED	STICK	STICK DIP	YES	No
1	1	00:34:20	ED	STICK	STICK DIP	YES	No
1	1	00:34:27	ED	STICK	STICK DIP	YES	No
1	1	00:34:31	ED	STICK	STICK DIP	YES	No
1	1	00:34:37	ED	STICK	STICK DIP	YES	No
1	1	00:34:43	ED	STICK	STICK DIP	YES	No
1	1	00:34:56	ED	STICK	STICK DIP	YES	No
1	1	00:34:58	ED	STICK	STICK DIP	YES	No
1	1	00:35:01	ED	STICK	STICK DIP	YES	No
1	1	00:35:04	ED	STICK	STICK DIP	YES	No
1	1	00:35:07	ED	STICK	STICK DIP	YES	No
1	1	00:35:09	ED	STICK	STICK DIP	YES	No
1	1	00:35:14	ED	STICK	STICK DIP	YES	No
1	1	00:35:17	ED	STICK	STICK DIP	YES	No
1	1	00:35:27	ED	STICK	STICK DIP	YES	No
1	1	00:35:32	ED	STICK	STICK DIP	YES	No
1	1	00:35:36	ED	STICK	STICK DIP	YES	No
1	1	00:35:50	ED	STICK	STICK DIP	YES	No
1	1	00:35:54	ED	STICK	STICK DIP	YES	No
1	1	00:36:02	ED	STICK	STICK DIP	YES	No
1	1	00:36:07	ED	STICK	STICK DIP	YES	No
1	1	00:36:14	ED	STICK	STICK DIP	YES	No
1	1	00:36:24	ED	STICK	STICK DIP	YES	No
1	1	00:36:27	ED	STICK	STICK DIP	YES	No
1	1	00:36:30	ED	STICK	STICK DIP	YES	No
1	1	00:36:37	ED	STICK	STICK DIP	YES	No
1	1	00:36:56	FK	STICK	STICK DIP	YES	No
1	1	00:37:04	FK	STICK	STICK DIP	YES	No
1	1	00:37:14	ED	STICK	STICK DIP	YES	No
1	1	00:37:34	ED	STICK	STICK DIP	NO	No
1	1	00:37:39	LU	STICK	STICK DIP	YES	No
1	1	00:37:44	ED	STICK	STICK DIP	NO	No
1	1	00:37:51	ED	STICK	STICK DIP	NO	No
1	1	00:38:03	ED	STICK	STICK DIP	UNKNOWN	No
1	1	00:38:10	ED	STICK	STICK DIP	YES	No
1	1	00:38:54	ED	STICK	STICK DIP	YES	No
1	1	00:39:13	ED	STICK	STICK DIP	YES	No
1	1	00:39:16	ED	STICK	STICK DIP	YES	No
1	1	00:39:23	ED	STICK	STICK DIP	YES	No
1	1	00:39:53	ED	HAND	HAND DIP	YES	No
1	1	00:39:55	ED	HAND	HAND DIP	YES	No
1	1	00:39:58	ED	HAND	HAND DIP	YES	No
1	1	00:40:01	ED	STICK	STICK DIP	YES	No
1	1	00:40:09	ED	STICK	STICK DIP	YES	No
1	1	00:40:20	ED	STICK	STICK DIP	YES	No
1	1	00:40:31	ED	HAND	HAND DIP	YES	No
1	1	00:40:35	ED	HAND	HAND DIP	YES	No
1	1	00:40:41	ED	STICK	STICK DIP	YES	No
1	1	00:40:45	ED	STICK	STICK DIP	YES	No
1	1	00:40:50	ED	STICK	STICK DIP	YES	No
1	1	00:40:54	ED	STICK	STICK DIP	YES	No
1	1	00:40:59	ED	STICK	STICK DIP	YES	No
1	1	00:41:02	ED	STICK	STICK DIP	YES	No
1	1	00:41:04	ED	STICK	STICK DIP	YES	No
1	1	00:41:07	ED	STICK	STICK DIP	YES	No
1	1	00:41:12	ED	STICK	STICK DIP	YES	No
1	1	00:41:15	ED	STICK	STICK DIP	YES	No
1	1	00:41:18	ED	STICK	STICK DIP	YES	No
1	1	00:41:21	ED	STICK	STICK DIP	YES	No
1	1	00:41:29	ED	STICK	STICK DIP	NO	No
1	1	00:41:42	ED	STICK	STICK DIP	YES	No
1	1	00:41:46	ED	STICK	STICK DIP	YES	No
1	1	00:41:58	ED	STICK	STICK DIP	YES	No
1	1	00:42:01	ED	STICK	STICK DIP	YES	No
1	1	00:42:08	ED	STICK	STICK DIP	YES	No
1	1	00:42:12	ED	STICK	STICK DIP	NO	No
1	1	00:42:17	ED	STICK	STICK DIP	NO	No
1	1	00:42:27	ED	STICK	STICK DIP	YES	No
1	1	00:42:40	ED	STICK	STICK DIP	YES	No
1	1	00:42:46	ED	STICK	STICK DIP	YES	No
1	1	00:42:48	ED	STICK	STICK DIP	YES	No
1	1	00:42:51	ED	STICK	STICK DIP	YES	No
1	1	00:43:02	ED	STICK	STICK DIP	YES	No
1	1	00:43:16	ED	STICK	STICK DIP	YES	No
1	1	00:43:28	ED	STICK	STICK DIP	YES	No
1	1	00:43:33	ED	STICK	STICK DIP	YES	No
1	1	00:43:36	ED	STICK	STICK DIP	YES	No
1	1	00:43:39	ED	STICK	STICK DIP	YES	No
1	1	00:43:42	ED	STICK	STICK DIP	YES	No
1	1	00:43:45	ED	STICK	STICK DIP	YES	No
1	1	00:43:49	ED	STICK	STICK DIP	YES	No
1	1	00:43:52	ED	STICK	STICK DIP	YES	No
1	1	00:43:56	ED	STICK	STICK DIP	YES	No
1	1	00:44:02	ED	STICK	STICK DIP	YES	No
1	1	00:44:07	ED	STICK	STICK DIP	YES	No
1	1	00:44:10	ED	STICK	STICK DIP	YES	No
1	1	00:44:16	ED	STICK	STICK DIP	YES	No
1	1	00:44:20	ED	STICK	STICK DIP	YES	No
1	1	00:44:24	ED	STICK	STICK DIP	YES	No
1	1	00:44:29	ED	STICK	STICK DIP	YES	No
1	1	00:44:32	ED	STICK	STICK DIP	YES	No
1	1	00:44:35	ED	STICK	STICK DIP	YES	No
1	1	00:44:38	ED	STICK	STICK DIP	YES	No
1	1	00:44:41	ED	STICK	STICK DIP	YES	No
1	1	00:44:47	ED	STICK	STICK DIP	YES	No
1	1	00:45:03	ED	STICK	STICK DIP	YES	No
2	1	00:45:33	KN	STICK	STICK DROP	YES	Yes
2	1	00:46:02	RE	HAND	HAND DIP	YES	No
2	1	00:46:04	RE	HAND	HAND DIP	YES	No
2	1	00:46:10	RE	HAND	HAND DIP	YES	No
2	1	00:46:12	RE	HAND	HAND DIP	YES	No
2	1	00:46:14	RE	HAND	HAND DIP	YES	No
2	1	00:46:16	RE	HAND	HAND DIP	YES	No
2	1	00:46:20	RE	HAND	HAND DIP	YES	No
2	1	00:46:23	RE	HAND	HAND DIP	YES	No
2	1	00:46:25	RE	HAND	HAND DIP	YES	No
2	1	00:46:28	RE	HAND	HAND DIP	YES	No
2	1	00:46:30	RE	HAND	HAND DIP	YES	No
2	1	00:46:32	RE	HAND	HAND DIP	YES	No
2	1	00:46:34	RE	HAND	HAND DIP	YES	No
2	1	00:46:36	RE	HAND	HAND DIP	YES	No
2	1	00:46:37	RE	HAND	HAND DIP	YES	No
2	1	00:46:40	RE	HAND	HAND DIP	YES	No
2	1	00:46:43	RE	HAND	HAND DIP	YES	No
2	1	00:46:46	RE	HAND	HAND DIP	YES	No
2	1	00:46:48	RE	HAND	HAND DIP	YES	No
2	1	00:46:50	RE	HAND	HAND DIP	YES	No
2	1	00:46:54	RE	HAND	HAND DIP	YES	No
2	1	00:46:56	RE	HAND	HAND DIP	YES	No
2	1	00:46:58	RE	HAND	HAND DIP	YES	No
2	1	00:47:01	RE	HAND	HAND DIP	YES	No
2	1	00:47:03	RE	HAND	HAND DIP	YES	No
2	1	00:47:07	RE	HAND	HAND DIP	YES	No
2	1	00:47:09	RE	HAND	HAND DIP	YES	No
2	1	00:47:12	RE	HAND	HAND DIP	YES	No
2	1	00:47:14	RE	HAND	HAND DIP	YES	No
2	1	00:47:15	RE	HAND	HAND DIP	YES	No
2	1	00:47:17	RE	HAND	HAND DIP	YES	No
2	1	00:47:21	RE	HAND	HAND DIP	YES	No
2	1	00:47:23	RE	HAND	HAND DIP	YES	No
2	1	00:47:30	EV	STICK	STICK DIP	NO	No
2	1	00:48:08	PE	STICK	STICK DIP	YES	No
2	1	00:48:21	PE	STICK	STICK DIP	NO	No
2	1	00:48:36	EV	HAND	HAND DIP	YES	No
2	1	00:48:39	EV	HAND	HAND DIP	YES	No
2	1	00:48:47	PE	STICK	STICK DIP	NO	No
2	1	00:48:49	PE	HAND	HAND DIP	YES	No
2	1	00:48:55	EV	STICK	STICK DIP	YES	No
2	1	00:49:16	EV	STICK	STICK DIP	YES	No
2	1	00:50:09	EV	STICK	STICK DIP	YES	No
2	1	00:50:47	EV	STICK	STICK DIP	YES	No
2	1	00:50:49	EV	STICK	STICK DIP	YES	No
2	1	00:50:52	EV	STICK	STICK DIP	YES	No
2	1	00:50:57	EV	STICK	STICK DIP	YES	No
2	1	00:51:03	EV	STICK	STICK DIP	YES	No
2	1	00:51:16	EV	STICK	STICK DIP	YES	No
2	1	00:51:54	EV	STICK	STICK DIP	NO	No
2	1	00:53:36	EV	STICK	STICK DROP	YES	Yes
2	1	00:53:58	EV	STICK	STICK DROP	YES	Yes
2	1	00:54:29	EV	STICK	STICK DIP	NO	No
2	1	00:54:45	EV	HAND	HAND DIP	YES	No
2	1	00:54:46	EV	HAND	HAND DIP	YES	No
2	1	00:54:49	EV	HAND	HAND DIP	YES	No
2	1	00:55:18	EV	HAND	HAND DIP	YES	No
2	1	00:55:21	EV	HAND	HAND DIP	YES	No
2	1	00:55:23	EV	HAND	HAND DIP	YES	No
2	1	00:55:26	EV	HAND	HAND DIP	YES	No
2	1	00:55:38	PE	STICK	STICK DIP	YES	No
2	1	00:55:52	PE	STICK	STICK DIP	YES	No
2	1	00:56:10	PE	STICK	STICK DIP	NO	No
2	1	00:56:17	PE	STICK	STICK DIP	NO	No
2	1	00:56:32	PE	STICK	STICK DIP	NO	No
2	1	00:56:46	EV	STICK	STICK DIP	NO	No
2	1	00:57:46	EV	STICK	STICK DIP	YES	No
2	1	00:58:25	EV	STICK	STICK DROP	YES	Yes
2	1	00:58:53	EV	HAND	HAND DIP	YES	No
2	1	00:58:59	EV	HAND	HAND DIP	YES	No
2	1	00:59:04	EV	HAND	HAND DIP	YES	No
2	1	00:59:06	EV	HAND	HAND DIP	YES	No
2	1	00:59:10	EV	HAND	HAND DIP	YES	No
2	1	00:59:14	EV	HAND	HAND DIP	YES	No
2	1	00:59:16	EV	HAND	HAND DIP	YES	No
2	1	00:59:18	EV	HAND	HAND DIP	YES	No
2	1	00:59:21	EV	HAND	HAND DIP	YES	No
2	1	00:59:22	EV	HAND	HAND DIP	YES	No
2	1	00:59:46	EV	HAND	HAND DIP	YES	No
2	1	01:01:09	ED	STICK	STICK DIP	NO	No
2	1	01:01:59	SO	HAND	HAND DIP	YES	No
2	1	01:02:12	SO	STICK	STICK DIP	NO	No
2	1	01:02:37	ED	STICK	STICK DIP	NO	No
2	1	01:04:02	EV	STICK	STICK DIP	YES	No
2	1	01:04:40	EV	STICK	STICK DIP	YES	No
2	1	01:05:41	EV	STICK	STICK DIP	YES	No
2	1	01:08:35	EV	STICK	STICK DIP	YES	No
2	1	01:09:23	EV	STICK	STICK DROP	YES	Yes
2	1	01:09:31	EV	STICK	STICK DROP	YES	Yes
2	1	01:09:48	ED	STICK	STICK DIP	YES	No
2	1	01:09:52	ED	STICK	STICK DIP	YES	No
2	1	01:10:00	ED	STICK	STICK DIP	NO	No
2	1	01:10:13	PE	STICK	STICK DIP	NO	No
2	1	01:10:29	ED	STICK	STICK DIP	NO	No
2	1	01:10:32	PE	STICK	STICK DIP	NO	No
2	1	01:10:39	ED	STICK	STICK DIP	UNKNOWN	No
2	1	01:10:50	ED	STICK	STICK DIP	UNKNOWN	No
2	1	01:10:57	PE	UNKNOWN/OTHER	drop	NO	No
2	1	01:11:05	ED	STICK	STICK DIP	NO	No
2	1	01:11:16	PE	STICK	STICK DIP	NO	No
2	1	01:11:26	ED	STICK	STICK DIP	NO	No
2	1	01:11:32	ED	STICK	STICK DIP	NO	No
2	1	01:11:37	ED	STICK	STICK DIP	YES	No
2	1	01:11:51	ED	STICK	STICK DIP	YES	No
2	1	01:11:54	PE	STICK	STICK DIP	NO	No
2	1	01:12:15	ED	STICK	STICK DIP	UNKNOWN	No
2	1	01:12:17	PE	STICK	STICK DIP	YES	No
2	1	01:12:28	ED	STICK	STICK DIP	NO	No
2	1	01:12:34	PE	STICK	STICK DIP	NO	No
2	1	01:12:36	PE	HAND	HAND DIP	YES	No
2	1	01:12:40	ED	STICK	STICK DIP	NO	No
2	1	01:12:44	PE	HAND	HAND DIP	YES	No
2	1	01:12:49	ED	STICK	STICK DIP	NO	No
2	1	01:12:53	PE	HAND	retrieve	YES	No
2	1	01:12:57	ED	STICK	STICK DIP	UNKNOWN	No
2	1	01:13:04	ED	STICK	STICK DIP	UNKNOWN	No
2	1	01:13:06	ED	STICK	STICK DIP	YES	No
2	1	01:13:12	ED	STICK	STICK DIP	YES	No
2	1	01:13:15	ED	STICK	STICK DIP	YES	No
2	1	01:13:19	ED	STICK	STICK DIP	YES	No
2	1	01:13:23	ED	STICK	STICK DIP	YES	No
2	1	01:13:25	ED	STICK	STICK DIP	YES	No
2	1	01:13:32	ED	STICK	STICK DIP	YES	No
2	1	01:13:35	ED	STICK	STICK DIP	YES	No
2	1	01:13:38	ED	STICK	STICK DIP	YES	No
2	1	01:13:53	ED	STICK	STICK DIP	YES	No
2	1	01:13:56	ED	STICK	STICK DIP	YES	No
2	1	01:14:01	ED	STICK	STICK DIP	YES	No
2	1	01:14:04	PE	UNKNOWN/OTHER	retrieve	YES	No
2	1	01:14:08	ED	STICK	STICK DIP	YES	No
2	1	01:14:11	ED	STICK	STICK DIP	YES	No
2	1	01:14:15	ED	STICK	STICK DIP	YES	No
2	1	01:14:21	ED	STICK	STICK DIP	YES	No
2	1	01:14:23	PE	HAND	HAND DIP	YES	No
2	1	01:14:33	PE	HAND	HAND DIP	YES	No
2	1	01:14:36	PE	HAND	HAND DIP	YES	No
2	1	01:14:38	PE	HAND	HAND DIP	YES	No
2	1	01:14:41	PE	HAND	HAND DIP	YES	No
2	1	01:14:44	PE	HAND	HAND DIP	YES	No
2	1	01:14:48	PE	HAND	HAND DIP	YES	No
2	1	01:14:51	PE	HAND	HAND DIP	YES	No
2	1	01:14:56	ED	STICK	STICK DIP	NO	No
2	1	01:15:09	ED	STICK	STICK DIP	YES	No
2	1	01:15:12	PE	HAND	HAND DIP	YES	No
2	1	01:15:14	PE	HAND	HAND DIP	YES	No
2	1	01:15:36	ED	STICK	STICK DIP	YES	No
2	1	01:15:43	ED	STICK	STICK DIP	YES	No
2	1	01:15:47	ED	STICK	STICK DIP	YES	No
2	1	01:15:53	ED	STICK	STICK DIP	YES	No
2	1	01:16:10	ED	STICK	STICK DIP	YES	No
2	1	01:16:14	ED	STICK	STICK DIP	YES	No
2	1	01:16:17	ED	STICK	STICK DIP	YES	No
2	1	01:16:29	ED	STICK	STICK DIP	YES	No
2	1	01:16:32	ED	STICK	STICK DIP	YES	No
2	1	01:16:35	ED	STICK	STICK DIP	NO	No
2	1	01:16:41	HL	STICK	STICK DIP	YES	No
2	1	01:16:57	HL	HAND	HAND DIP	NO	No
2	1	01:16:59	ED	STICK	STICK DIP	NO	No
2	1	01:17:07	HL	STICK	STICK DIP	NO	No
2	1	01:17:16	HL	HAND	HAND DIP	NO	No
2	1	01:17:33	ED	STICK	STICK DIP	NO	No
2	1	01:17:39	ED	STICK	STICK DIP	YES	No
2	1	01:17:42	ED	STICK	STICK DIP	YES	No
2	1	01:17:47	ED	STICK	STICK DIP	YES	No
2	1	01:17:50	ED	STICK	STICK DIP	YES	No
2	1	01:17:52	ED	STICK	STICK DIP	YES	No
2	1	01:17:55	ED	STICK	STICK DIP	YES	No
2	1	01:18:00	ED	STICK	STICK DIP	NO	No
2	1	01:18:05	ED	STICK	STICK DIP	NO	No
2	1	01:18:12	ED	HAND	HAND DIP	YES	No
2	1	01:18:14	ED	HAND	HAND DIP	YES	No
2	1	01:18:15	ED	HAND	HAND DIP	YES	No
2	1	01:18:17	ED	HAND	HAND DIP	YES	No
2	1	01:18:22	ED	STICK	STICK DIP	NO	No
2	1	01:18:28	ED	STICK	STICK DIP	YES	No
2	1	01:18:35	ED	STICK	STICK DIP	YES	No
2	1	01:18:37	ED	STICK	STICK DIP	YES	No
2	1	01:18:44	ED	STICK	STICK DIP	YES	No
2	1	01:18:46	ED	STICK	STICK DIP	YES	No
2	1	01:18:50	ED	STICK	STICK DIP	YES	No
2	1	01:18:52	ED	STICK	STICK DIP	YES	No
2	1	01:18:57	ED	STICK	STICK DIP	YES	No
2	1	01:19:00	ED	STICK	STICK DIP	YES	No
2	1	01:19:03	ED	STICK	STICK DIP	YES	No
2	1	01:19:06	ED	STICK	STICK DIP	YES	No
2	1	01:19:12	ED	STICK	STICK DIP	YES	No
2	1	01:19:17	ED	STICK	STICK DIP	YES	No
2	1	01:19:21	ED	STICK	STICK DIP	YES	No
2	1	01:19:23	ED	STICK	STICK DIP	YES	No
2	1	01:19:25	ED	STICK	STICK DIP	YES	No
2	1	01:19:41	ED	STICK	STICK DIP	YES	No
2	1	01:19:44	ED	STICK	STICK DIP	YES	No
2	1	01:19:49	ED	STICK	STICK DIP	YES	No
2	1	01:19:52	ED	STICK	STICK DIP	YES	No
2	1	01:19:55	ED	STICK	STICK DIP	YES	No
2	1	01:19:58	ED	STICK	STICK DIP	YES	No
2	1	01:20:01	ED	STICK	STICK DIP	YES	No
2	1	01:20:03	ED	STICK	STICK DIP	YES	No
2	1	01:20:05	ED	STICK	STICK DIP	YES	No
2	1	01:20:08	ED	STICK	STICK DIP	YES	No
2	1	01:20:12	ED	STICK	STICK DIP	YES	No
2	1	01:20:15	ED	STICK	STICK DIP	YES	No
2	1	01:20:17	ED	STICK	STICK DIP	YES	No
2	1	01:20:19	ED	STICK	STICK DIP	YES	No
2	1	01:20:21	ED	STICK	STICK DIP	YES	No
2	1	01:20:24	ED	STICK	STICK DIP	YES	No
2	1	01:20:26	ED	STICK	STICK DIP	YES	No
2	1	01:20:32	ED	STICK	STICK DIP	YES	No
2	1	01:20:34	ED	STICK	STICK DIP	YES	No
2	1	01:20:36	ED	STICK	STICK DIP	YES	No
2	1	01:20:37	ED	STICK	STICK DIP	YES	No
2	1	01:20:38	ED	STICK	STICK DIP	YES	No
2	1	01:20:41	ED	STICK	STICK DIP	YES	No
2	1	01:20:53	ED	STICK	STICK DIP	YES	No
2	1	01:20:59	ED	STICK	STICK DIP	YES	No
2	1	01:21:06	ED	STICK	STICK DIP	YES	No
2	1	01:21:12	ED	STICK	STICK DIP	YES	No
2	1	01:21:16	ED	STICK	STICK DIP	YES	No
2	1	01:21:21	ED	STICK	STICK DIP	YES	No
2	1	01:21:30	ED	STICK	STICK DIP	YES	No
2	1	01:22:22	ED	STICK	STICK DIP	NO	No
2	1	01:22:32	ED	STICK	STICK DIP	NO	No
2	1	01:22:42	ED	STICK	STICK DIP	YES	No
2	1	01:22:48	ED	STICK	STICK DIP	YES	No
2	1	01:22:54	ED	HAND	HAND DIP	YES	No
2	1	01:22:56	ED	HAND	HAND DIP	YES	No
2	1	01:22:58	ED	HAND	HAND DIP	YES	No
2	1	01:23:00	ED	HAND	HAND DIP	YES	No
2	1	01:23:03	ED	HAND	HAND DIP	YES	No
2	1	01:23:07	ED	HAND	HAND DIP	NO	No
2	1	01:23:21	ED	STICK	STICK DIP	UNKNOWN	No
2	1	01:23:38	ED	STICK	STICK DIP	NO	No
2	1	01:24:03	ED	STICK	STICK DIP	YES	No
2	1	01:24:06	ED	STICK	STICK DIP	YES	No
2	1	01:24:10	ED	STICK	STICK DIP	YES	No
2	1	01:24:22	ED	STICK	STICK DIP	NO	No
2	1	01:24:38	ED	STICK	STICK DIP	YES	No
2	1	01:24:47	ED	STICK	STICK DIP	YES	No
2	1	01:24:52	ED	STICK	STICK DIP	YES	No
2	1	01:24:54	ED	STICK	STICK DIP	YES	No
2	1	01:24:57	ED	STICK	STICK DIP	YES	No
2	1	01:25:00	ED	STICK	STICK DIP	YES	No
2	1	01:25:02	ED	STICK	STICK DIP	YES	No
2	1	01:25:05	ED	STICK	STICK DIP	YES	No
2	1	01:25:07	ED	STICK	STICK DIP	YES	No
2	1	01:25:10	ED	STICK	STICK DIP	YES	No
2	1	01:25:18	ED	STICK	STICK DIP	YES	No
2	1	01:25:24	ED	STICK	STICK DIP	YES	No
2	1	01:25:28	ED	STICK	STICK DIP	YES	No
2	1	01:25:30	ED	STICK	STICK DIP	YES	No
2	1	01:25:32	ED	STICK	STICK DIP	YES	No
2	1	01:25:39	ED	STICK	STICK DIP	YES	No
2	1	01:25:43	ED	STICK	STICK DIP	YES	No
2	1	01:25:45	ED	STICK	STICK DIP	YES	No
2	1	01:25:47	ED	STICK	STICK DIP	YES	No
2	1	01:25:49	ED	STICK	STICK DIP	YES	No
2	1	01:25:54	ED	STICK	STICK DIP	YES	No
2	1	01:25:56	ED	STICK	STICK DIP	YES	No
2	1	01:25:59	ED	STICK	STICK DIP	YES	No
2	1	01:26:03	ED	STICK	STICK DIP	YES	No
2	1	01:26:07	ED	STICK	STICK DIP	YES	No
2	1	01:26:10	ED	STICK	STICK DIP	YES	No
2	1	01:26:12	ED	STICK	STICK DIP	NO	No
2	1	01:26:14	ED	STICK	STICK DIP	YES	No
2	1	01:26:20	ED	STICK	STICK DIP	YES	No
2	1	01:26:22	ED	STICK	STICK DIP	YES	No
2	1	01:26:25	ED	STICK	STICK DIP	YES	No
2	1	01:26:30	ED	STICK	STICK DIP	YES	No
2	1	01:26:34	ED	STICK	STICK DIP	YES	No
2	1	01:26:42	ED	STICK	STICK DIP	YES	No
3	1	01:27:31	FK	STICK	STICK DROP	NO	Yes
3	1	01:28:29	ED	STICK	STICK DIP	NO	No
3	1	01:28:35	ED	STICK	STICK DIP	YES	No
3	1	01:28:38	ED	STICK	STICK DIP	YES	No
3	1	01:28:43	ED	STICK	STICK DIP	YES	No
3	1	01:28:51	ED	STICK	STICK DIP	YES	No
3	1	01:28:57	ED	STICK	STICK DIP	YES	No
3	1	01:29:09	ED	STICK	STICK DIP	YES	No
3	1	01:29:31	ED	STICK	STICK DIP	YES	No
3	1	01:29:35	ED	STICK	STICK DIP	YES	No
3	1	01:29:38	ED	STICK	STICK DIP	YES	No
3	1	01:29:47	ED	STICK	STICK DIP	YES	No
3	1	01:29:51	ED	STICK	STICK DIP	YES	No
3	1	01:29:53	ED	STICK	STICK DIP	YES	No
3	1	01:29:55	ED	STICK	STICK DIP	YES	No
3	1	01:29:59	ED	STICK	STICK DIP	YES	No
3	1	01:30:03	ED	STICK	STICK DIP	YES	No
3	1	01:30:29	ED	STICK	STICK DIP	YES	No
3	1	01:30:36	ED	STICK	STICK DIP	YES	No
3	1	01:30:49	ED	STICK	STICK DIP	YES	No
3	1	01:30:57	ED	STICK	STICK DIP	YES	No
3	1	01:31:00	ED	STICK	STICK DIP	YES	No
3	1	01:31:05	ED	STICK	STICK DIP	YES	No
3	1	01:31:09	ED	STICK	STICK DIP	YES	No
3	1	01:31:12	ED	STICK	STICK DIP	YES	No
3	1	01:31:33	EM	HAND	HAND DIP	NO	No
3	1	01:31:38	EM	STICK	STICK DIP	NO	No
3	1	01:31:47	LU	STICK	STICK DIP	NO	No
3	1	01:31:55	EM	HAND	HAND DIP	NO	No
3	1	01:31:59	EM	HAND	HAND DIP	UNKNOWN	No
3	1	01:32:02	LU	STICK	STICK DIP	YES	No
3	1	01:32:14	LU	HAND	HAND DIP	NO	No
3	1	01:32:16	EM	STICK	STICK DIP	YES	No
3	1	01:32:21	EM	STICK	STICK DIP	NO	No
3	1	01:32:24	LO	STICK	STICK DIP	YES	No
3	1	01:32:44	ED	STICK	STICK DIP	YES	No
3	1	01:32:54	ED	STICK	STICK DIP	YES	No
3	1	01:32:59	ED	STICK	STICK DIP	YES	No
3	1	01:33:02	ED	STICK	STICK DIP	YES	No
3	1	01:33:05	ED	STICK	STICK DIP	YES	No
3	1	01:33:26	ED	STICK	STICK DIP	YES	No
3	1	01:33:33	ED	HAND	HAND DIP	YES	No
3	1	01:33:34	ED	HAND	HAND DIP	YES	No
3	1	01:33:38	ED	HAND	HAND DIP	YES	No
3	1	01:33:39	ED	HAND	HAND DIP	YES	No
3	1	01:33:41	ED	HAND	HAND DIP	YES	No
3	1	01:33:43	ED	HAND	HAND DIP	YES	No
3	1	01:33:44	ED	HAND	HAND DIP	YES	No
3	1	01:33:47	ED	HAND	HAND DIP	YES	No
3	1	01:33:48	ED	HAND	HAND DIP	YES	No
3	1	01:33:51	ED	HAND	HAND DIP	YES	No
3	1	01:33:54	ED	HAND	HAND DIP	YES	No
3	1	01:33:57	ED	HAND	HAND DIP	YES	No
3	1	01:33:59	ED	HAND	HAND DIP	YES	No
3	1	01:34:01	ED	HAND	HAND DIP	YES	No
3	1	01:34:04	ED	HAND	HAND DIP	YES	No
3	1	01:34:08	ED	HAND	HAND DIP	NO	No
3	1	01:34:14	ED	STICK	STICK DIP	YES	No
3	1	01:34:37	ED	HAND	HAND DIP	YES	No
3	1	01:34:40	ED	HAND	HAND DIP	UNKNOWN	No
3	1	01:34:48	ED	STICK	STICK DIP	YES	No
3	1	01:35:05	ED	STICK	STICK DIP	YES	No
3	1	01:35:33	ED	STICK	STICK DIP	YES	No
3	1	01:36:13	ED	STICK	STICK DIP	YES	No
3	1	01:36:31	ED	STICK	STICK DIP	YES	No
3	1	01:36:42	ED	STICK	STICK DIP	YES	No
3	1	01:36:51	ED	STICK	STICK DIP	YES	No
3	1	01:37:00	ED	STICK	STICK DIP	YES	No
3	1	01:37:41	ED	STICK	STICK DIP	YES	No
3	1	01:38:00	ED	STICK	STICK DIP	YES	No
3	1	01:38:33	ED	STICK	STICK DIP	YES	No
3	1	01:38:35	ED	HAND	HAND DIP	YES	No
3	1	01:38:37	ED	HAND	HAND DIP	YES	No
3	1	01:38:39	ED	HAND	HAND DIP	YES	No
3	1	01:38:41	ED	HAND	HAND DIP	YES	No
3	1	01:38:44	ED	HAND	HAND DIP	YES	No
3	1	01:38:47	ED	HAND	HAND DIP	NO	No
3	1	01:38:50	ED	HAND	HAND DIP	YES	No
3	1	01:38:52	ED	HAND	HAND DIP	YES	No
3	1	01:38:54	ED	HAND	HAND DIP	YES	No
3	1	01:38:57	ED	HAND	HAND DIP	YES	No
3	1	01:38:59	ED	HAND	HAND DIP	YES	No
3	1	01:39:01	ED	HAND	HAND DIP	YES	No
3	1	01:39:04	ED	HAND	HAND DIP	YES	No
3	1	01:39:09	ED	HAND	HAND DIP	YES	No
3	1	01:39:11	ED	HAND	HAND DIP	YES	No
3	1	01:39:16	ED	HAND	HAND DIP	YES	No
3	1	01:39:18	ED	HAND	HAND DIP	YES	No
3	1	01:39:43	ED	HAND	HAND DIP	YES	No
3	1	01:40:01	ED	HAND	HAND DIP	YES	No
3	1	01:40:03	ED	HAND	HAND DIP	YES	No
3	1	01:40:06	ED	HAND	HAND DIP	YES	No
3	1	01:40:07	ED	HAND	HAND DIP	YES	No
3	1	01:40:10	ED	HAND	HAND DIP	YES	No
3	1	01:40:15	ED	HAND	HAND DIP	YES	No
3	1	01:40:18	ED	HAND	HAND DIP	YES	No
3	1	01:40:20	ED	HAND	HAND DIP	YES	No
3	1	01:40:21	ED	HAND	HAND DIP	YES	No
3	1	01:40:24	ED	HAND	HAND DIP	YES	No
3	1	01:40:50	LO	STICK	STICK DIP	YES	No
3	1	01:41:02	LO	STICK	STICK DIP	YES	No
3	1	01:41:12	LO	STICK	STICK DIP	YES	No
3	1	01:41:55	EM	STICK	STICK DIP	NO	No
3	1	01:42:10	EM	HAND	HAND DIP	UNKNOWN	No
3	1	01:42:15	EM	HAND	HAND DIP	NO	No
3	1	01:42:19	EM	HAND	HAND DIP	UNKNOWN	No
3	1	01:42:38	EM	STICK	STICK DROP	YES	Yes
3	1	01:42:49	EM	STICK	STICK DROP	YES	Yes
3	1	01:43:19	EM	STICK	STICK DIP	YES	No
3	1	01:43:52	EM	STICK	STICK DIP	NO	No
3	1	01:44:43	ED	STICK	STICK DIP	YES	No
3	1	01:45:24	ED	STICK	STICK DIP	YES	No
3	1	01:45:43	ED	STICK	STICK DIP	YES	No
3	1	01:46:16	ED	HAND	HAND DIP	UNKNOWN	No
3	1	01:48:10	FK	HAND	HAND DIP	YES	No
3	1	01:48:17	FK	STICK	STICK DIP	NO	No
3	1	01:49:02	FK	STICK	STICK DROP	NO	Yes
3	1	01:49:13	FK	STICK	STICK DIP	YES	No
3	1	01:49:19	FK	STICK	STICK DIP	YES	No
3	1	01:50:12	FK	STICK	STICK DIP	NO	No
3	1	01:50:35	FK	STICK	STICK DROP	NO	Yes
3	1	01:50:43	FK	STICK	STICK DIP	NO	No
3	1	01:51:17	FK	STICK	STICK DIP	YES	No
3	1	01:51:24	FK	STICK	STICK DIP	NO	No
3	1	01:52:04	FK	STICK	STICK DROP	YES	Yes
3	1	01:52:10	FK	STICK	STICK DIP	YES	No
3	1	01:52:19	FK	STICK	STICK DROP	YES	Yes
3	1	01:52:30	FK	STICK	STICK DROP	YES	Yes
3	1	01:52:36	FK	STICK	STICK DIP	YES	No
3	1	01:52:43	FK	STICK	STICK DIP	YES	No
3	1	01:52:53	FK	STICK	STICK DROP	YES	Yes
3	1	01:53:25	FK	STICK	STICK DROP	NO	Yes
3	1	01:53:43	FK	STICK	STICK DROP	YES	Yes
3	1	01:53:51	FK	STICK	STICK DIP	YES	No
3	1	01:56:34	FK	STICK	STICK DROP	YES	Yes
3	1	01:56:49	FK	HAND	HAND DIP	YES	No
3	1	01:56:52	FK	HAND	HAND DIP	YES	No
3	1	01:56:55	FK	HAND	HAND DIP	YES	No
3	1	01:56:59	FK	HAND	HAND DIP	YES	No
3	1	01:57:04	FK	HAND	HAND DIP	YES	No
3	1	01:57:08	FK	HAND	HAND DIP	YES	No
3	1	01:57:15	FK	HAND	HAND DIP	YES	No
3	1	01:57:19	FK	HAND	HAND DIP	YES	No
3	1	01:57:23	FK	HAND	HAND DIP	YES	No
3	1	01:57:26	FK	HAND	HAND DIP	YES	No
3	1	01:57:33	FK	HAND	HAND DIP	YES	No
3	1	01:57:36	FK	HAND	HAND DIP	YES	No
3	1	01:57:40	FK	HAND	HAND DIP	YES	No
3	1	01:57:44	FK	HAND	HAND DIP	YES	No
3	1	01:57:55	FK	HAND	HAND DIP	YES	No
3	1	01:57:59	FK	HAND	HAND DIP	YES	No
3	1	01:58:05	FK	HAND	HAND DIP	YES	No
3	1	01:58:09	FK	HAND	HAND DIP	YES	No
3	1	01:58:17	FK	HAND	HAND DIP	YES	No
3	1	01:58:21	FK	HAND	HAND DIP	YES	No
3	1	01:58:32	FK	HAND	HAND DIP	YES	No
3	1	01:58:48	FK	STICK	STICK DROP	YES	Yes
3	1	01:58:55	FK	STICK	STICK DROP	YES	Yes
3	1	01:59:05	FK	STICK	STICK DIP	YES	No
3	1	01:59:22	FK	HAND	HAND DIP	YES	No
3	1	01:59:28	FK	HAND	HAND DIP	YES	No
3	1	02:14:50	PE	HAND	HAND DIP	YES	No
3	1	02:15:10	PE	STICK	STICK DIP	YES	No
3	1	02:15:22	PE	STICK	STICK DIP	YES	No
3	1	02:15:31	PE	STICK	STICK DIP	YES	No
3	1	02:15:50	PE	HAND	HAND DIP	YES	No
3	1	02:15:52	PE	HAND	HAND DIP	YES	No
3	1	02:15:55	PE	HAND	HAND DIP	YES	No
3	1	02:16:09	PE	HAND	HAND DIP	YES	No
3	1	02:16:12	PE	HAND	HAND DIP	YES	No
3	1	02:16:24	PE	HAND	HAND DIP	YES	No
3	1	02:16:27	PE	HAND	HAND DIP	YES	No
3	1	02:16:29	PE	HAND	HAND DIP	YES	No
3	1	02:16:33	PE	HAND	HAND DIP	YES	No
3	1	02:16:35	PE	HAND	HAND DIP	YES	No
3	1	02:16:44	PE	HAND	HAND DIP	YES	No
3	1	02:16:47	PE	HAND	HAND DIP	YES	No
3	1	02:16:57	PE	STICK	STICK DIP	YES	No
3	1	02:17:02	PE	STICK	STICK DIP	YES	No
3	1	02:17:05	PE	STICK	STICK DIP	YES	No
3	1	02:17:07	PE	STICK	STICK DIP	YES	No
3	1	02:17:11	PE	STICK	STICK DIP	YES	No
3	1	02:17:14	PE	STICK	STICK DIP	YES	No
3	1	02:17:17	PE	STICK	STICK DIP	YES	No
3	1	02:17:21	PE	STICK	STICK DIP	YES	No
3	1	02:17:24	PE	STICK	STICK DIP	YES	No
3	1	02:17:27	PE	STICK	STICK DIP	YES	No
3	1	02:17:32	PE	STICK	STICK DIP	YES	No
3	1	02:17:35	PE	STICK	STICK DIP	YES	No
3	1	02:17:40	PE	STICK	STICK DIP	YES	No
3	1	02:17:44	PE	STICK	STICK DIP	YES	No
3	1	02:17:49	PE	STICK	STICK DIP	YES	No
3	1	02:18:08	PE	HAND	HAND DIP	YES	No
3	1	02:18:10	PE	HAND	HAND DIP	YES	No
3	1	02:18:22	PE	HAND	HAND DIP	YES	No
3	1	02:18:31	PE	HAND	HAND DIP	YES	No
3	1	02:18:34	PE	HAND	HAND DIP	YES	No
3	1	02:18:37	PE	HAND	HAND DIP	YES	No
3	1	02:18:40	PE	HAND	HAND DIP	YES	No
3	1	02:18:43	PE	HAND	HAND DIP	YES	No
3	1	02:18:59	PE	HAND	HAND DIP	YES	No
3	1	02:19:02	PE	HAND	HAND DIP	YES	No
3	1	02:19:05	PE	HAND	HAND DIP	YES	No
4	1	02:20:46	RE	HAND	HAND DIP	YES	No
4	1	02:20:49	RE	HAND	HAND DIP	YES	No
4	1	02:20:52	RE	HAND	HAND DIP	YES	No
4	1	02:20:57	RE	HAND	HAND DIP	YES	No
4	1	02:20:59	RE	HAND	HAND DIP	YES	No
4	1	02:21:02	RE	HAND	HAND DIP	YES	No
4	1	02:21:04	RE	HAND	HAND DIP	YES	No
4	1	02:21:06	RE	HAND	HAND DIP	YES	No
4	1	02:21:08	RE	HAND	HAND DIP	YES	No
4	1	02:21:30	EV	HAND	HAND DIP	YES	No
4	1	02:21:47	EV	STICK	STICK DIP	YES	No
4	1	02:23:48	EV	STICK	STICK DIP	YES	No
4	1	02:23:56	EV	STICK	STICK DIP	YES	No
4	1	02:24:03	EV	STICK	STICK DIP	YES	No
4	1	02:24:06	EV	STICK	STICK DIP	YES	No
4	1	02:24:09	EV	STICK	STICK DIP	YES	No
4	1	02:24:15	EV	STICK	STICK DIP	YES	No
4	1	02:24:20	EV	STICK	STICK DIP	YES	No
4	1	02:25:06	EV	STICK	STICK DIP	YES	No
4	1	02:25:31	EV	STICK	STICK DIP	YES	No
4	1	02:25:48	EV	STICK	STICK DIP	YES	No
4	1	02:26:08	EV	STRAW	STRAW DROP	NO	No
4	1	02:27:14	EV	STICK	STICK DIP	YES	No
4	1	02:27:32	EV	STICK	STICK DIP	YES	No
4	1	02:27:55	EV	HAND	HAND DIP	YES	No
4	1	02:27:58	EV	HAND	HAND DIP	YES	No
4	1	02:28:00	EV	HAND	HAND DIP	YES	No
4	1	02:28:03	EV	HAND	HAND DIP	YES	No
4	1	02:28:05	EV	HAND	HAND DIP	YES	No
4	1	02:28:14	EV	STICK	STICK DIP	NO	No
4	1	02:28:36	EV	STICK	STICK DIP	NO	No
4	1	02:28:59	EV	STICK	STICK DIP	YES	No
4	1	02:29:35	EV	STICK	STICK DIP	YES	No
4	1	02:29:40	EV	STICK	STICK DIP	YES	No
4	1	02:29:47	EV	STICK	STICK DIP	YES	No
4	1	02:30:11	EV	STICK	STICK DIP	YES	No
4	1	02:30:20	EV	STICK	STICK DIP	YES	No
4	1	02:30:24	EV	STICK	STICK DIP	YES	No
4	1	02:30:29	EV	STICK	STICK DIP	YES	No
4	1	02:30:35	EV	STICK	STICK DIP	YES	No
4	1	02:30:40	EV	STICK	STICK DIP	YES	No
4	1	02:30:46	EV	STICK	STICK DIP	YES	No
4	1	02:30:51	EV	STICK	STICK DIP	NO	No
4	1	02:32:16	EV	STICK	STICK DIP	YES	No
4	1	02:32:23	EV	STICK	STICK DIP	NO	No
4	1	02:33:49	EV	STICK	STICK DIP	YES	No
4	1	02:34:55	EV	STICK	STICK DIP	YES	No
4	1	02:35:00	EV	STICK	STICK DIP	YES	No
4	1	02:35:04	EV	STICK	STICK DIP	YES	No
4	1	02:35:10	EV	STICK	STICK DIP	YES	No
4	1	02:35:14	EV	STICK	STICK DIP	YES	No
4	1	02:35:18	EV	STICK	STICK DIP	YES	No
4	1	02:35:22	EV	STICK	STICK DIP	YES	No
4	1	02:35:26	EV	STICK	STICK DIP	YES	No
4	1	02:35:30	EV	STICK	STICK DIP	YES	No
4	1	02:35:33	EV	STICK	STICK DIP	YES	No
4	1	02:35:35	EV	STICK	STICK DIP	YES	No
4	1	02:35:39	EV	STICK	STICK DIP	YES	No
4	1	02:35:48	EV	STICK	STICK DIP	YES	No
4	1	02:36:21	EV	STICK	STICK DIP	YES	No
4	1	02:36:32	EV	STICK	STICK DIP	YES	No
4	1	02:36:38	EV	STICK	STICK DIP	YES	No
4	1	02:37:24	EV	STICK	STICK DIP	YES	No
4	1	02:38:33	EV	STICK	STICK DIP	YES	No
4	1	02:40:20	EV	STICK	STICK DIP	YES	No
4	1	02:41:17	EV	STICK	STICK DIP	YES	No
4	1	02:41:44	EV	STICK	STICK DIP	YES	No
4	1	02:42:18	EV	STICK	STICK DIP	YES	No
4	1	02:42:22	EV	STICK	STICK DIP	YES	No
4	1	02:42:26	EV	STICK	STICK DIP	YES	No
4	1	02:42:35	EV	STICK	STICK DIP	YES	No
4	1	02:42:38	EV	STICK	STICK DIP	YES	No
4	1	02:42:41	EV	STICK	STICK DIP	YES	No
4	1	02:42:43	EV	STICK	STICK DIP	YES	No
4	1	02:42:45	EV	STICK	STICK DIP	YES	No
4	1	02:42:50	EV	STICK	STICK DIP	UNKNOWN	No
4	1	02:42:52	EV	STICK	STICK DIP	NO	No
4	1	02:43:29	EV	STICK	STICK DIP	NO	No
4	1	02:44:09	EV	STICK	STICK DIP	UNKNOWN	No
4	1	02:44:26	EV	STICK	STICK DIP	YES	No
4	1	02:44:39	EV	STICK	STICK DIP	YES	No
4	1	02:45:15	EV	STICK	STICK DIP	YES	No
4	1	02:45:23	EV	STICK	STICK DIP	YES	No
4	1	02:45:27	EV	STICK	STICK DIP	UNKNOWN	No
4	1	02:46:22	EV	STICK	STICK DIP	NO	No
4	1	02:47:59	PE	STICK	STICK DIP	YES	No
4	1	02:48:16	PE	HAND	HAND DIP	YES	No
4	1	02:48:38	PE	LEAFYSTICK	STICK DIP	YES	Yes
4	1	02:48:50	PE	STICK	STICK DIP	YES	No
4	1	02:49:00	PE	STICK	STICK DIP	YES	No
4	1	02:49:27	PE	STICK	STICK DIP	YES	No
4	1	02:49:46	PE	HAND	HAND DIP	YES	No
4	1	02:49:56	PE	HAND	HAND DIP	YES	No
4	1	02:50:15	PE	HAND	HAND DIP	YES	No
4	1	02:50:21	PE	HAND	HAND DIP	YES	No
4	1	02:50:25	PE	HAND	HAND DIP	YES	No
4	1	02:50:33	PE	STICK	STICK DROP	NO	Yes
4	1	02:50:36	PE	HAND	HAND DIP	YES	No
4	1	02:50:45	PE	STICK	STICK DIP	YES	No
4	1	02:50:48	PE	STICK	STICK DIP	YES	No
4	1	02:51:05	PE	STICK	STICK DIP	NO	No
4	1	02:51:26	PE	STICK	STICK DIP	NO	No
4	1	02:52:31	PE	HAND	HAND DIP	YES	No
5	1	03:15:39	EM	STICK	STICK DIP	NO	No
5	1	03:15:59	EM	STICK	STICK DIP	NO	No
5	1	03:16:06	EM	STICK	STICK DIP	YES	No
5	1	03:16:21	EM	HAND	HAND DIP	YES	No
5	1	03:16:26	EM	HAND	HAND DIP	YES	No
5	1	03:16:36	EM	STICK	STICK DIP	YES	No
5	1	03:16:40	EM	STICK	STICK DIP	YES	No
5	1	03:16:43	EM	STICK	STICK DIP	YES	No
5	1	03:16:48	EM	HAND	HAND DIP	YES	No
5	1	03:16:53	EM	HAND	HAND DIP	YES	No
5	1	03:16:58	EM	HAND	HAND DIP	NO	No
5	1	03:17:17	EM	STICK	STICK DIP	NO	No
5	1	03:17:25	KL	STICK	STICK DIP	YES	No
5	1	03:17:35	EM	STICK	STICK DIP	NO	No
5	1	03:17:47	KL	STICK	STICK DIP	YES	No
5	1	03:17:54	EM	STICK	STICK DIP	NO	No
5	1	03:18:02	KL	STICK	STICK DIP	NO	No
5	1	03:18:10	EM	HAND	HAND DIP	YES	No
5	1	03:18:20	KL	HAND	HAND DIP	YES	No
5	1	03:18:32	KL	STICK	STICK DIP	NO	No
5	1	03:18:43	KL	STICK	STICK DIP	YES	No
5	1	03:19:10	KL	STICK	STICK DIP	YES	No
5	1	03:19:19	KL	STICK	STICK DIP	YES	No
5	1	03:19:28	KL	HAND	HAND DIP	YES	No
5	1	03:21:29	KL	STICK	STICK DIP	YES	No
5	1	03:21:39	KL	STICK	STICK DIP	NO	No
5	1	03:22:04	KL	HAND	HAND DIP	YES	No
5	1	03:22:14	KL	HAND	HAND DIP	NO	No
5	1	03:22:15	KL	STICK	STICK DIP	NO	No
5	1	03:22:28	KL	STICK	STICK DIP	NO	No
5	1	03:24:00	KL	STICK	STICK DIP	NO	No
5	1	03:24:45	KL	STICK	STICK DIP	YES	No
5	1	03:25:23	KL	STICK	STICK DIP	YES	No
5	1	03:25:32	KL	STICK	STICK DIP	NO	No
5	1	03:25:51	KL	STICK	STICK DIP	YES	No
5	1	03:25:56	KL	STICK	STICK DIP	YES	No
5	1	03:26:04	KL	STICK	STICK DIP	YES	No
5	1	03:26:42	EM	HAND	HAND DIP	YES	No
5	1	03:26:47	EM	HAND	HAND DIP	UNKNOWN	No
5	1	03:27:00	EM	STICK	STICK DIP	NO	No
5	1	03:27:16	DA	STICK	STICK DIP	NO	No
5	1	03:27:57	DA	STICK	STICK DIP	YES	No
5	1	03:28:03	DA	STICK	STICK DIP	NO	No
5	1	03:29:14	KL	STICK	STICK DIP	YES	No
5	1	03:29:18	KL	STICK	STICK DIP	NO	No
5	1	03:29:20	DA	STICK	STICK DIP	YES	No
5	1	03:29:25	KL	HAND	HAND DIP	YES	No
5	1	03:29:34	KL	HAND	HAND DIP	YES	No
5	1	03:29:49	KL	STICK	STICK DIP	NO	No
5	1	03:29:53	LU	STICK	STICK DIP	UNKNOWN	No
5	1	03:30:08	LU	STICK	STICK DIP	YES	No
5	1	03:30:19	LU	HAND	HAND DIP	YES	No
5	1	03:30:22	LU	HAND	HAND DIP	YES	No
5	1	03:30:32	LU	STICK	STICK DIP	NO	No
5	1	03:30:38	LU	HAND	HAND DIP	YES	No
5	1	03:30:57	KL	HAND	HAND DIP	UNKNOWN	No
5	1	03:31:15	KL	HAND	HAND DIP	NO	No
5	1	03:31:22	KL	STICK	STICK DIP	NO	No
5	1	03:31:50	LU	STICK	STICK DIP	NO	No
5	1	03:36:54	LB	STICK	STICK DIP	YES	No
6	1	03:38:37	EV	HAND	HAND DIP	NO	No
6	1	03:38:52	EV	STRAW	HAND DIP	NO	No
6	1	03:39:02	EV	STRAW	HAND DIP	NO	No
6	1	03:39:31	EV	STICK	STICK DIP	YES	No
6	1	03:40:42	EV	STICK	STICK DIP	YES	No
6	1	03:40:47	EV	STICK	STICK DIP	YES	No
6	1	03:40:55	EV	STICK	STICK DIP	YES	No
6	1	03:40:58	EV	STICK	STICK DIP	YES	No
6	1	03:41:01	EV	STICK	STICK DIP	YES	No
6	1	03:41:05	EV	STICK	STICK DIP	YES	No
6	1	03:41:09	EV	STICK	STICK DIP	YES	No
6	1	03:41:12	EV	STICK	STICK DIP	NO	No
6	1	03:41:40	EV	STICK	STICK DIP	NO	No
6	1	03:41:57	EV	STICK	STICK DIP	YES	No
6	1	03:42:42	EV	STICK	STICK DIP	YES	No
6	1	03:42:50	EV	STICK	STICK DIP	YES	No
6	1	03:42:53	EV	STICK	STICK DIP	YES	No
6	1	03:42:56	EV	STICK	STICK DIP	YES	No
6	1	03:42:59	EV	STICK	STICK DIP	YES	No
6	1	03:43:03	EV	STICK	STICK DIP	YES	No
6	1	03:43:05	EV	STICK	STICK DIP	YES	No
6	1	03:43:08	EV	STICK	STICK DIP	YES	No
6	1	03:43:11	EV	STICK	STICK DIP	YES	No
6	1	03:43:14	EV	STICK	STICK DIP	YES	No
6	1	03:43:26	EV	STICK	STICK DIP	YES	No
6	1	03:43:30	EV	STICK	STICK DIP	YES	No
6	1	03:43:33	EV	STICK	STICK DIP	YES	No
6	1	03:43:36	EV	STICK	STICK DIP	YES	No
6	1	03:43:39	EV	STICK	STICK DIP	YES	No
6	1	03:43:43	EV	STICK	STICK DIP	YES	No
6	1	03:43:48	EV	STICK	STICK DIP	YES	No
6	1	03:44:08	EV	STICK	STICK DIP	NO	No
6	1	03:45:23	LO	STICK	STICK DIP	YES	No
6	1	03:45:27	LO	STICK	STICK DIP	NO	No
6	1	03:46:26	KN	STICK	STICK DIP	YES	No
6	1	03:47:31	FK	HAND	HAND DIP	YES	No
6	1	03:49:20	ED	STICK	STICK DIP	YES	No
6	1	03:49:34	ED	STICK	STICK DIP	YES	No
6	1	03:49:41	ED	STICK	STICK DIP	YES	No
6	1	03:49:47	ED	STICK	STICK DIP	YES	No
6	1	03:49:57	ED	STICK	STICK DIP	YES	No
6	1	03:50:06	ED	STICK	STICK DIP	YES	No
6	1	03:50:10	ED	STICK	STICK DIP	YES	No
6	1	03:50:14	ED	STICK	STICK DIP	YES	No
6	1	03:50:19	ED	STICK	STICK DIP	YES	No
6	1	03:54:18	RE	HAND	HAND DIP	YES	No
6	1	04:07:17	FK	STICK	STICK DIP	YES	No
6	1	04:07:45	FK	STICK	STICK DIP	NO	No
6	1	04:08:09	FK	STICK	STICK DIP	NO	No
6	1	04:08:53	FK	HAND	HAND DIP	UNKNOWN	No
6	1	04:09:48	FK	STICK	STICK DIP	YES	No
6	1	04:10:29	FK	STICK	STICK DIP	YES	No
6	1	04:11:03	FK	HAND	HAND DIP	UNKNOWN	No
6	1	04:13:22	FK	STICK	STICK DROP	YES	Yes
6	1	04:14:40	FK	STICK	STICK DROP	YES	Yes
6	1	04:15:02	FK	STICK	STICK DROP	YES	Yes
6	1	04:15:12	FK	STICK	STICK DROP	YES	Yes
6	1	04:15:22	FK	STICK	STICK DROP	YES	Yes
6	1	04:15:27	FK	STICK	STICK DROP	YES	Yes
6	1	04:15:32	FK	STICK	STICK DROP	YES	Yes
6	1	04:15:43	FK	STICK	STICK DROP	YES	Yes
6	1	04:15:59	FK	STICK	STICK DROP	YES	Yes
6	1	04:16:07	FK	STICK	STICK DROP	NO	Yes
6	1	04:16:16	FK	HAND	HAND DIP	YES	No
6	1	04:16:19	FK	HAND	HAND DIP	YES	No
6	1	04:16:21	FK	HAND	HAND DIP	YES	No
6	1	04:16:23	FK	HAND	HAND DIP	YES	No
6	1	04:16:27	FK	HAND	HAND DIP	YES	No
6	1	04:16:29	FK	HAND	HAND DIP	YES	No
6	1	04:16:31	FK	HAND	HAND DIP	YES	No
6	1	04:16:34	FK	HAND	HAND DIP	YES	No
6	1	04:16:38	FK	HAND	HAND DIP	YES	No
6	1	04:16:54	FK	HAND	HAND DIP	YES	No
6	1	04:16:58	FK	HAND	HAND DIP	YES	No
6	1	04:17:02	FK	HAND	HAND DIP	YES	No
6	1	04:17:08	FK	HAND	HAND DIP	YES	No
6	1	04:17:13	FK	HAND	HAND DIP	YES	No
6	1	04:17:19	FK	HAND	HAND DIP	YES	No
6	1	04:17:26	FK	HAND	HAND DIP	YES	No
6	1	04:17:34	FK	HAND	HAND DIP	YES	No
6	1	04:17:40	FK	HAND	HAND DIP	YES	No
6	1	04:17:45	FK	HAND	HAND DIP	YES	No
6	1	04:17:53	FK	HAND	HAND DIP	YES	No
6	1	04:17:58	FK	HAND	HAND DIP	YES	No
6	1	04:18:04	FK	HAND	HAND DIP	YES	No
6	1	04:18:22	FK	HAND	HAND DIP	YES	No
6	1	04:18:27	FK	HAND	HAND DIP	YES	No
6	1	04:18:43	FK	HAND	HAND DIP	YES	No
6	1	04:18:55	FK	HAND	HAND DIP	YES	No
6	1	04:18:59	FK	HAND	HAND DIP	YES	No
6	1	04:19:05	FK	HAND	HAND DIP	YES	No
6	1	04:19:16	FK	HAND	HAND DIP	YES	No
6	1	04:19:31	FK	STICK	STICK DROP	NO	Yes
6	1	04:19:37	FK	HAND	HAND DIP	YES	No
6	1	04:19:44	FK	HAND	HAND DIP	YES	No
6	1	04:20:14	FK	HAND	HAND DIP	YES	No
6	1	04:20:17	FK	HAND	HAND DIP	YES	No
6	1	04:20:26	FK	HAND	HAND DIP	YES	No
6	1	04:20:29	FK	HAND	HAND DIP	YES	No
6	1	04:20:31	FK	HAND	HAND DIP	YES	No
6	1	04:20:34	FK	HAND	HAND DIP	YES	No
6	1	04:20:37	FK	HAND	HAND DIP	YES	No
6	1	04:20:47	FK	HAND	HAND DIP	YES	No
6	1	04:20:49	FK	HAND	HAND DIP	YES	No
6	1	04:20:51	FK	HAND	HAND DIP	YES	No
6	1	04:20:55	FK	HAND	HAND DIP	YES	No
6	1	04:20:58	FK	HAND	HAND DIP	YES	No
6	1	04:21:01	FK	HAND	HAND DIP	YES	No
6	1	04:21:03	FK	HAND	HAND DIP	YES	No
6	1	04:21:19	ED	STICK	STICK DIP	YES	No
6	1	04:21:27	ED	STICK	STICK DIP	YES	No
6	1	04:21:32	ED	STICK	STICK DIP	YES	No
6	1	04:21:35	ED	STICK	STICK DIP	YES	No
6	1	04:21:39	ED	STICK	STICK DIP	YES	No
6	1	04:21:44	ED	STICK	STICK DIP	YES	No
6	1	04:22:10	ED	STICK	STICK DIP	YES	No
6	1	04:22:22	ED	STICK	STICK DIP	YES	No
6	1	04:22:29	ED	STICK	STICK DIP	YES	No
6	1	04:22:34	ED	STICK	STICK DIP	YES	No
6	1	04:22:47	ED	STICK	STICK DIP	YES	No
6	1	04:22:52	ED	STICK	STICK DIP	YES	No
6	1	04:23:03	ED	UNKNOWN/OTHER	OTHER	NO	No
6	1	04:24:00	ED	STICK	STICK DIP	YES	No
6	1	04:24:08	ED	STICK	STICK DIP	YES	No
6	1	04:24:12	ED	STICK	STICK DIP	YES	No
6	1	04:24:14	ED	STICK	STICK DIP	YES	No
6	1	04:24:17	ED	STICK	STICK DIP	YES	No
6	1	04:24:22	ED	STICK	STICK DIP	YES	No
6	1	04:24:29	ED	STICK	STICK DIP	YES	No
6	1	04:24:31	ED	STICK	STICK DIP	YES	No
6	1	04:24:35	ED	STICK	STICK DIP	YES	No
6	1	04:24:38	ED	STICK	STICK DIP	YES	No
6	1	04:24:40	ED	STICK	STICK DIP	YES	No
7	1	04:25:33	PE	STICK	STICK DIP	YES	No
7	1	04:25:37	PE	STICK	STICK DIP	YES	No
7	1	04:25:39	PE	STICK	STICK DIP	YES	No
7	1	04:25:43	PE	STICK	STICK DIP	YES	No
7	1	04:25:46	PE	STICK	STICK DIP	YES	No
7	1	04:25:48	PE	STICK	STICK DIP	YES	No
7	1	04:25:57	PE	STICK	STICK DIP	YES	No
7	1	04:25:59	PE	STICK	STICK DIP	YES	No
7	1	04:26:02	PE	STICK	STICK DIP	YES	No
7	1	04:26:11	PE	STICK	STICK DIP	YES	No
7	1	04:26:15	PE	STICK	STICK DIP	YES	No
7	1	04:26:19	PE	STICK	STICK DIP	YES	No
7	1	04:26:20	PE	STICK	STICK DIP	YES	No
7	1	04:26:23	PE	STICK	STICK DIP	YES	No
7	1	04:26:31	PE	STICK	STICK DIP	YES	No
7	1	04:26:43	PE	STICK	HAND DIP	YES	No
7	1	04:26:53	PE	HAND	HAND DIP	YES	No
7	1	04:26:55	PE	HAND	HAND DIP	YES	No
7	1	04:26:58	PE	HAND	HAND DIP	YES	No
7	1	04:27:00	PE	HAND	HAND DIP	YES	No
7	1	04:27:12	PE	HAND	HAND DIP	YES	No
7	1	04:27:14	PE	HAND	HAND DIP	YES	No
7	1	04:27:17	PE	HAND	HAND DIP	YES	No
7	1	04:27:32	PE	HAND	HAND DIP	YES	No
7	1	04:27:35	PE	HAND	HAND DIP	YES	No
7	1	04:27:47	PE	HAND	HAND DIP	YES	No
7	1	04:27:49	PE	HAND	HAND DIP	YES	No
7	1	04:27:52	PE	HAND	HAND DIP	YES	No
7	1	04:27:54	PE	HAND	HAND DIP	YES	No
7	1	04:28:08	PE	HAND	HAND DIP	YES	No
7	1	04:28:10	PE	HAND	HAND DIP	YES	No
7	1	04:28:12	PE	HAND	HAND DIP	YES	No
7	1	04:28:14	PE	HAND	HAND DIP	YES	No
7	1	04:28:16	PE	HAND	HAND DIP	YES	No
7	1	04:28:33	PE	HAND	HAND DIP	YES	No
7	1	04:28:35	PE	HAND	HAND DIP	YES	No
7	1	04:28:37	PE	HAND	HAND DIP	YES	No
7	1	04:28:50	PE	HAND	HAND DIP	YES	No
7	1	04:28:52	PE	HAND	HAND DIP	YES	No
7	1	04:28:54	PE	HAND	HAND DIP	YES	No
7	1	04:29:09	PE	HAND	HAND DIP	YES	No
7	1	04:29:11	PE	HAND	HAND DIP	YES	No
7	1	04:29:13	PE	HAND	HAND DIP	YES	No
7	1	04:29:37	PE	HAND	HAND DIP	YES	No
7	1	04:29:39	PE	HAND	HAND DIP	YES	No
7	1	04:29:41	PE	HAND	HAND DIP	YES	No
7	1	04:29:45	PE	HAND	HAND DIP	YES	No
7	1	04:30:09	PE	STICK	STICK DIP	YES	No
7	1	04:30:16	PE	STICK	STICK DIP	YES	No
7	1	04:30:21	PE	HAND	HAND DIP	YES	No
7	1	04:30:23	PE	HAND	HAND DIP	YES	No
7	1	04:30:25	PE	HAND	HAND DIP	YES	No
7	1	04:30:30	PE	HAND	HAND DIP	YES	No
7	1	04:30:32	PE	HAND	HAND DIP	YES	No
7	1	04:30:47	PE	HAND	HAND DIP	YES	No
7	1	04:30:49	PE	HAND	HAND DIP	YES	No
7	1	04:31:00	PE	STICK	STICK DIP	YES	No
7	1	04:31:16	PE	HAND	HAND DIP	YES	No
7	1	04:31:18	PE	HAND	HAND DIP	YES	No
7	1	04:31:20	PE	HAND	HAND DIP	YES	No
7	1	04:31:23	PE	HAND	HAND DIP	YES	No
7	1	04:31:34	PE	HAND	HAND DIP	YES	No
7	1	04:31:36	PE	HAND	HAND DIP	YES	No
7	1	04:32:03	PE	STICK	STICK DIP	YES	No
7	1	04:32:10	PE	HAND	HAND DIP	YES	No
7	1	04:32:12	PE	HAND	HAND DIP	YES	No
7	1	04:32:14	PE	HAND	HAND DIP	YES	No
7	1	04:32:17	PE	HAND	HAND DIP	YES	No
7	1	04:32:20	PE	HAND	HAND DIP	YES	No
7	1	04:32:31	PE	STICK	STICK DIP	YES	No
7	1	04:32:43	PE	HAND	HAND DIP	YES	No
7	1	04:32:49	PE	HAND	HAND DIP	YES	No
7	1	04:32:52	PE	HAND	HAND DIP	YES	No
7	1	04:32:56	PE	HAND	HAND DIP	YES	No
7	1	04:33:00	PE	HAND	HAND DIP	YES	No
7	1	04:33:02	PE	HAND	HAND DIP	YES	No
7	1	04:33:05	PE	HAND	HAND DIP	YES	No
7	1	04:33:18	PE	STICK	STICK DROP	NO	Yes
7	1	04:33:23	PE	HAND	HAND DIP	YES	No
7	1	04:33:28	PE	HAND	HAND DIP	YES	No
7	1	04:33:32	PE	HAND	HAND DIP	NO	No
7	1	04:33:37	PE	STICK	STICK DIP	YES	No
7	1	04:33:49	PE	HAND	FISH	YES	No
7	1	04:34:06	PE	HAND	HAND DIP	YES	No
7	1	04:34:09	PE	HAND	HAND DIP	YES	No
7	1	04:34:12	PE	HAND	HAND DIP	YES	No
7	1	04:34:17	PE	HAND	HAND DIP	YES	No
7	1	04:34:20	PE	HAND	HAND DIP	YES	No
7	1	04:34:32	PE	HAND	HAND DIP	YES	No
7	1	04:34:35	PE	HAND	HAND DIP	YES	No
7	1	04:34:37	PE	HAND	HAND DIP	YES	No
7	1	04:34:40	PE	HAND	HAND DIP	YES	No
7	1	04:35:10	EV	STICK	STICK DIP	NO	No
7	1	04:35:19	EV	STICK	STICK DIP	YES	No
7	1	04:35:52	EV	STICK	STICK DIP	NO	No
7	1	04:36:24	EV	STICK	STICK DIP	YES	No
7	1	04:37:30	EV	STICK	STICK DIP	YES	No
7	1	04:38:32	EV	STICK	STICK DIP	YES	No
7	1	04:39:37	EV	STICK	STICK DIP	YES	No
7	1	04:41:11	EV	STICK	STICK DIP	YES	No
7	1	04:41:24	EV	STICK	STICK DIP	YES	No
7	1	04:44:21	FK	HAND	HAND DIP	NO	No
7	1	04:47:25	ED	STICK	STICK DIP	YES	No
7	1	04:47:28	ED	STICK	STICK DIP	YES	No
7	1	04:47:31	ED	STICK	STICK DIP	YES	No
7	1	04:50:31	RE	HAND	HAND DIP	YES	No
7	1	04:51:00	RE	STICK	STICK DIP	NO	No
7	1	04:51:05	EM	HAND	HAND DIP	NO	No
7	1	04:51:08	EM	STICK	STICK DIP	YES	No
7	1	04:51:15	EM	STICK	STICK DIP	YES	No
7	1	04:51:30	EM	STICK	STICK DIP	NO	No
7	1	04:52:40	PE	STICK	retrieve	NO	No
7	1	04:53:01	PE	HAND	HAND DIP	NO	No
7	1	04:53:36	PE	HAND	HAND DIP	YES	No
7	1	04:53:39	PE	HAND	HAND DIP	YES	No
7	1	05:10:27	RE	LEAFYSTICK	OTHER	NO	Yes
7	1	05:10:46	RE	LEAFYSTICK	OTHER	NO	Yes
7	1	05:12:46	RE	LEAFYSTICK	retrieve	NO	Yes
8	1	05:17:42	KN	STICK	STICK DIP	YES	No
8	1	05:17:45	KN	STICK	STICK DIP	YES	No
8	1	05:17:56	KN	LEAFYSTICK	STICK DIP	YES	Yes
8	1	05:17:59	KN	LEAFYSTICK	STICK DIP	YES	Yes
8	1	05:18:01	KN	LEAFYSTICK	STICK DIP	YES	Yes
8	1	05:18:04	KN	LEAFYSTICK	STICK DIP	YES	Yes
8	1	05:18:06	KN	LEAFYSTICK	STICK DIP	YES	Yes
8	1	05:18:08	KN	LEAFYSTICK	STICK DIP	YES	Yes
8	1	05:18:15	KN	HAND	HAND DIP	YES	No
8	1	05:55:08	KL	STICK	STICK DIP	YES	No
8	1	05:55:21	KL	HAND	HAND DIP	YES	No
8	1	05:55:40	KL	STICK	STICK DIP	YES	No
8	1	05:55:47	KL	LEAFYSTICK	STICK DIP	YES	Yes
8	1	05:55:54	KL	HAND	HAND DIP	YES	No
8	1	05:56:21	KL	LEAFYSTICK	STICK DIP	YES	Yes
8	1	05:56:26	KL	LEAFYSTICK	leaf push	YES	Yes
8	1	05:56:55	KL	HAND	HAND DIP	YES	No
8	1	05:57:04	KL	LEAFYSTICK	STICK DIP	YES	Yes
8	1	05:57:31	KL	LEAFYSTICK	STICK DIP	YES	Yes
8	1	05:57:38	KL	STICK	STICK DIP	YES	No
8	1	05:57:41	KL	STICK	STICK DIP	YES	No
8	1	05:57:44	KL	HAND	HAND DIP	NO	No
8	1	05:57:52	KL	HAND	HAND DIP	YES	No
8	1	05:58:00	KL	STICK	STICK DIP	YES	No
8	1	05:58:19	KL	HAND	HAND DIP	NO	No
8	1	05:59:26	KL	STICK	STICK DIP	YES	No
8	1	05:59:50	KL	STICK	STICK DIP	YES	No
8	1	06:00:00	KL	STICK	STICK DIP	YES	No
8	1	06:00:17	KL	STICK	STICK DIP	YES	No
8	1	06:00:22	KL	STICK	STICK DIP	YES	No
8	1	06:00:26	KL	STICK	STICK DIP	YES	No
8	1	06:00:31	KL	STICK	STICK DIP	YES	No
8	1	06:00:35	KL	STICK	STICK DIP	YES	No
8	1	06:00:40	KL	STICK	STICK DIP	YES	No
8	1	06:01:00	KL	HAND	HAND DIP	YES	No
8	1	06:01:05	KL	HAND	HAND DIP	YES	No
8	1	06:01:08	KL	HAND	HAND DIP	YES	No
8	1	06:01:15	KL	STICK	STICK DIP	YES	No
8	1	06:01:35	KL	LEAFYSTICK	STICK DIP	YES	Yes
8	1	06:01:49	KL	HAND	HAND DIP	NO	No
8	1	06:01:55	KL	STICK	STICK DIP	YES	No
8	1	06:02:12	KL	STICK	STICK DIP	YES	No
8	1	06:02:17	KL	STICK	STICK DIP	YES	No
8	1	06:02:23	KL	STICK	STICK DIP	YES	No
8	1	06:02:49	KL	HAND	HAND DIP	NO	No
9	1	06:06:49	PE	STICK	STICK DIP	NO	No
9	1	06:06:57	PE	HAND	HAND DIP	YES	No
9	1	06:06:59	PE	HAND	HAND DIP	YES	No
9	1	06:07:02	PE	HAND	HAND DIP	YES	No
9	1	06:07:05	PE	HAND	HAND DIP	YES	No
9	1	06:07:11	PE	HAND	HAND DIP	YES	No
9	1	06:07:17	PE	HAND	HAND DIP	YES	No
9	1	06:07:19	PE	HAND	HAND DIP	YES	No
9	1	06:07:27	PE	STICK	STICK DIP	YES	No
9	1	06:07:46	PE	HAND	HAND DIP	YES	No
9	1	06:07:49	PE	HAND	HAND DIP	YES	No
9	1	06:07:52	PE	HAND	HAND DIP	YES	No
9	1	06:08:03	PE	HAND	HAND DIP	YES	No
9	1	06:08:05	PE	HAND	HAND DIP	YES	No
9	1	06:08:13	PE	HAND	HAND DIP	YES	No
9	1	06:08:16	PE	HAND	HAND DIP	YES	No
9	1	06:08:19	PE	HAND	HAND DIP	YES	No
9	1	06:08:21	PE	HAND	HAND DIP	YES	No
9	1	06:08:24	PE	HAND	HAND DIP	YES	No
9	1	06:08:33	KL	STICK	STICK DIP	NO	No
9	1	06:08:56	PE	HAND	HAND DIP	YES	No
9	1	06:09:14	PE	STICK	STICK DIP	YES	No
9	1	06:09:18	PE	STICK	STICK DIP	YES	No
9	1	06:09:21	PE	STICK	STICK DIP	YES	No
9	1	06:09:27	PE	STICK	STICK DIP	YES	No
9	1	06:09:36	PE	HAND	HAND DIP	YES	No
9	1	06:09:48	PE	STICK	STICK DIP	NO	No
9	1	06:10:28	PE	STICK	STICK DIP	YES	No
9	1	06:11:04	PE	STICK	retrieve	YES	No
9	1	06:11:11	PE	HAND	HAND DIP	YES	No
9	1	06:11:14	PE	HAND	HAND DIP	YES	No
9	1	06:11:19	PE	HAND	HAND DIP	YES	No
9	1	06:11:21	PE	HAND	HAND DIP	YES	No
9	1	06:11:22	PE	HAND	HAND DIP	YES	No
9	1	06:11:28	PE	HAND	HAND DIP	YES	No
9	1	06:11:30	PE	HAND	HAND DIP	YES	No
9	1	06:11:32	PE	HAND	HAND DIP	YES	No
9	1	06:11:34	PE	HAND	HAND DIP	YES	No
9	1	06:11:36	PE	HAND	HAND DIP	YES	No
9	1	06:11:46	PE	HAND	HAND DIP	YES	No
9	1	06:11:48	PE	HAND	HAND DIP	YES	No
9	1	06:11:49	PE	HAND	HAND DIP	YES	No
9	1	06:11:53	PE	HAND	HAND DIP	YES	No
9	1	06:12:19	PE	STICK	STICK DIP	NO	No
9	1	06:12:21	PE	HAND	HAND DIP	YES	No
9	1	06:12:24	PE	HAND	HAND DIP	YES	No
9	1	06:12:26	PE	HAND	HAND DIP	YES	No
9	1	06:12:31	PE	HAND	HAND DIP	YES	No
9	1	06:12:35	PE	HAND	HAND DIP	YES	No
9	1	06:12:49	EV	HAND	HAND DIP	YES	No
9	1	06:13:13	EV	STICK	STICK DIP	NO	No
9	1	06:13:56	EV	STICK	STICK DIP	YES	No
9	1	06:14:44	EV	STICK	STICK DIP	NO	No
9	1	06:15:08	EV	STICK	STICK DIP	YES	No
9	1	06:15:20	EV	STICK	STICK DIP	YES	No
9	1	06:15:30	EV	STICK	STICK DIP	YES	No
9	1	06:16:14	EV	STICK	STICK DIP	YES	No
9	1	06:16:29	EV	STICK	STICK DIP	YES	No
9	1	06:16:46	EV	STICK	STICK DIP	YES	No
9	1	06:17:05	EV	STICK	STICK DIP	YES	No
9	1	06:17:13	EV	STICK	STICK DIP	YES	No
9	1	06:17:21	EV	STICK	STICK DIP	YES	No
9	1	06:17:37	EV	STICK	STICK DIP	NO	No
9	1	06:17:58	EV	HAND	HAND DIP	NO	No
9	1	06:18:02	EV	STICK	STICK DIP	YES	No
9	1	06:18:08	EV	STICK	STICK DIP	YES	No
9	1	06:18:14	EV	STICK	STICK DIP	YES	No
9	1	06:18:19	EV	STICK	STICK DIP	YES	No
9	1	06:18:22	EV	STICK	STICK DIP	YES	No
9	1	06:18:28	EV	STICK	STICK DIP	YES	No
9	1	06:18:31	EV	STICK	STICK DIP	YES	No
9	1	06:18:39	EV	STICK	STICK DIP	YES	No
9	1	06:18:45	EV	STICK	STICK DIP	YES	No
9	1	06:18:48	EV	STICK	STICK DIP	YES	No
9	1	06:18:52	EV	STICK	STICK DIP	YES	No
9	1	06:18:57	EV	STICK	STICK DIP	YES	No
9	1	06:19:02	EV	STICK	STICK DIP	YES	No
9	1	06:19:06	EV	STICK	STICK DIP	YES	No
9	1	06:19:10	EV	STICK	STICK DIP	YES	No
9	1	06:19:29	EV	STICK	STICK DIP	YES	No
9	1	06:19:55	EV	STICK	STICK DIP	YES	No
9	1	06:19:59	EV	STICK	STICK DIP	YES	No
9	1	06:20:03	EV	STICK	STICK DIP	UNKNOWN	No
9	1	06:20:09	EV	STICK	STICK DIP	YES	No
9	1	06:20:16	EV	STICK	STICK DIP	YES	No
9	1	06:20:27	EV	STICK	STICK DIP	YES	No
9	1	06:20:31	EV	STICK	STICK DIP	YES	No
9	1	06:20:40	EV	STICK	STICK DIP	YES	No
9	1	06:20:59	EV	STICK	STICK DIP	YES	No
9	1	06:21:04	EV	STICK	STICK DIP	YES	No
9	1	06:21:12	EV	STICK	STICK DIP	YES	No
9	1	06:21:17	EV	STICK	STICK DIP	YES	No
9	1	06:21:22	EV	STICK	STICK DIP	YES	No
9	1	06:21:27	EV	STICK	STICK DIP	YES	No
9	1	06:21:34	EV	STICK	STICK DIP	YES	No
9	1	06:21:41	EV	STICK	STICK DIP	YES	No
9	1	06:21:46	EV	STICK	STICK DIP	YES	No
9	1	06:21:52	EV	STICK	STICK DIP	YES	No
9	1	06:21:57	EV	STICK	STICK DIP	YES	No
9	1	06:22:02	EV	STICK	STICK DIP	YES	No
9	1	06:23:04	EV	STICK	STICK DIP	YES	No
9	1	06:23:07	EV	STICK	STICK DIP	YES	No
9	1	06:23:11	EV	STICK	STICK DIP	YES	No
9	1	06:23:14	EV	STICK	STICK DIP	YES	No
9	1	06:23:21	EV	STICK	STICK DIP	YES	No
9	1	06:23:49	EV	STICK	STICK DIP	YES	No
9	1	06:24:08	EV	STICK	STICK DIP	YES	No
9	1	06:24:14	EV	STICK	STICK DIP	YES	No
9	1	06:24:19	EV	STICK	STICK DIP	YES	No
9	1	06:24:29	EV	STICK	STICK DIP	YES	No
9	1	06:24:34	EV	STICK	STICK DIP	YES	No
9	1	06:24:57	EV	HAND	HAND DIP	YES	No
9	1	06:25:03	EV	HAND	HAND DIP	YES	No
9	1	06:25:06	EV	HAND	HAND DIP	YES	No
9	1	06:25:08	EV	HAND	HAND DIP	YES	No
9	1	06:25:15	EV	HAND	HAND DIP	YES	No
9	1	06:25:17	EV	HAND	HAND DIP	YES	No
9	1	06:25:19	EV	HAND	HAND DIP	YES	No
9	1	06:25:23	EV	HAND	HAND DIP	YES	No
9	1	06:25:25	EV	HAND	HAND DIP	YES	No
9	1	06:25:27	EV	HAND	HAND DIP	YES	No
9	1	06:25:33	EV	HAND	HAND DIP	YES	No
9	1	06:25:34	EV	HAND	HAND DIP	YES	No
9	1	06:25:51	EV	STICK	STICK DIP	YES	No
9	1	06:26:00	EV	STICK	STICK DIP	YES	No
9	1	06:26:09	EV	STICK	STICK DIP	YES	No
9	1	06:26:19	EV	STICK	STICK DIP	YES	No
9	1	06:26:30	EV	STICK	STICK DIP	YES	No
9	1	06:26:34	EV	STICK	STICK DIP	YES	No
9	1	06:26:38	EV	STICK	STICK DIP	YES	No
9	1	06:26:43	EV	STICK	STICK DIP	YES	No
9	1	06:26:48	EV	STICK	STICK DIP	YES	No
9	1	06:26:51	EV	STICK	STICK DIP	YES	No
9	1	06:26:58	EV	STICK	STICK DIP	YES	No
9	1	06:27:02	EV	STICK	STICK DIP	YES	No
9	1	06:27:08	EV	STICK	STICK DIP	YES	No
9	1	06:27:22	EV	STICK	STICK DIP	YES	No
9	1	06:27:35	EV	STICK	STICK DIP	YES	No
9	1	06:27:39	EV	STICK	STICK DIP	YES	No
9	1	06:27:58	EV	STICK	STICK DIP	YES	No
9	1	06:28:04	EV	STICK	STICK DIP	YES	No
9	1	06:28:08	EV	STICK	STICK DIP	YES	No
9	1	06:28:11	EV	STICK	STICK DIP	YES	No
9	1	06:28:15	EV	STICK	STICK DIP	YES	No
9	1	06:28:20	EV	STICK	STICK DIP	YES	No
9	1	06:28:25	EV	STICK	STICK DIP	YES	No
9	1	06:28:53	EV	STICK	STICK DIP	YES	No
9	1	06:28:57	EV	STICK	STICK DIP	YES	No
9	1	06:29:01	EV	STICK	STICK DIP	YES	No
9	1	06:29:05	EV	STICK	STICK DIP	YES	No
9	1	06:29:10	EV	STICK	STICK DIP	YES	No
9	1	06:29:16	EV	STICK	STICK DIP	YES	No
9	1	06:29:19	EV	STICK	STICK DIP	YES	No
9	1	06:29:23	EV	STICK	STICK DIP	YES	No
9	1	06:29:33	EV	STICK	STICK DIP	YES	No
9	1	06:29:36	EV	STICK	STICK DIP	UNKNOWN	No
9	1	06:29:39	EV	STICK	STICK DIP	YES	No
9	1	06:30:03	EV	STICK	STICK DIP	YES	No
9	1	06:30:11	EV	STICK	STICK DIP	YES	No
9	1	06:30:36	EV	STICK	STICK DIP	YES	No
9	1	06:30:44	EV	STICK	STICK DIP	YES	No
9	1	06:30:49	EV	STICK	STICK DIP	YES	No
9	1	06:30:57	EV	STICK	STICK DIP	YES	No
9	1	06:31:34	FK	HAND	HAND DIP	NO	No
9	1	06:31:39	FK	STICK	STICK DIP	NO	No
9	1	06:31:55	KL	HAND	HAND DIP	NO	No
9	1	06:32:25	KL	STICK	STICK DIP	UNKNOWN	No
9	1	06:32:50	KL	STICK	STICK DIP	YES	No
9	1	06:33:08	KL	STICK	STICK DIP	NO	No
9	1	06:33:10	KL	HAND	HAND DIP	NO	No
9	1	06:33:15	KL	STICK	STICK DIP	YES	No
9	1	06:33:19	KL	HAND	HAND DIP	NO	No
9	1	06:33:21	KL	STICK	STICK DIP	YES	No
9	1	06:33:24	KL	STICK	STICK DIP	YES	No
9	1	06:33:27	KL	STICK	STICK DIP	YES	No
9	1	06:33:32	KL	STICK	STICK DIP	YES	No
9	1	06:33:43	KL	STICK	STICK DIP	NO	No
9	1	06:33:47	KL	HAND	HAND DIP	YES	No
9	1	06:33:54	KL	HAND	HAND DIP	YES	No
9	1	06:34:01	KL	STICK	STICK DIP	YES	No
9	1	06:34:06	KL	STICK	STICK DIP	YES	No
9	1	06:34:15	KL	STICK	STICK DIP	YES	No
9	1	06:34:25	KL	STICK	STICK DIP	YES	No
9	1	06:34:30	KL	HAND	HAND DIP	NO	No
9	1	06:34:36	KL	STICK	STICK DIP	YES	No
9	1	06:34:49	KL	STICK	STICK DIP	YES	No
9	1	06:34:58	KL	STICK	STICK DIP	YES	No
9	1	06:35:44	KL	STICK	STICK DIP	YES	No
9	1	06:35:46	KL	STICK	STICK DIP	YES	No
9	1	06:35:49	KL	STICK	STICK DIP	YES	No
9	1	06:35:52	KL	STICK	STICK DIP	YES	No
9	1	06:35:56	KL	STICK	STICK DIP	YES	No
9	1	06:36:08	KL	STICK	STICK DIP	YES	No
9	1	06:36:12	KL	STICK	STICK DIP	YES	No
9	1	06:36:18	KL	STICK	STICK DIP	YES	No
9	1	06:36:28	KL	STICK	STICK DIP	YES	No
9	1	06:36:34	KL	STICK	STICK DIP	YES	No
9	1	06:36:41	KL	STICK	STICK DIP	YES	No
9	1	06:36:47	KL	STICK	STICK DIP	YES	No
9	1	06:36:50	KL	STICK	STICK DIP	YES	No
9	1	06:36:56	KL	STICK	STICK DIP	NO	No
9	1	06:37:09	KL	STICK	STICK DIP	YES	No
9	1	06:37:35	KL	STICK	STICK DIP	YES	No
9	1	06:37:45	KL	STICK	STICK DIP	YES	No
9	1	06:37:55	KL	STICK	STICK DIP	YES	No
9	1	06:38:19	SO	HAND	FISH	YES	No
9	1	06:38:25	PE	STICK	STICK DIP	NO	No
9	1	06:39:03	PE	HAND	HAND DIP	YES	No
9	1	06:39:07	PE	HAND	HAND DIP	YES	No
9	1	06:39:18	PE	STICK	STICK DIP	YES	No
9	1	06:39:22	PE	STICK	STICK DIP	YES	No
9	1	06:39:26	PE	STICK	STICK DIP	YES	No
9	1	06:39:30	PE	STICK	STICK DIP	YES	No
9	1	06:39:37	PE	STICK	STICK DIP	YES	No
9	1	06:39:39	PE	STICK	STICK DIP	YES	No
9	1	06:39:47	PE	STICK	STICK DIP	YES	No
9	1	06:39:51	PE	STICK	STICK DIP	YES	No
9	1	06:40:03	PE	STICK	STICK DIP	YES	No
9	1	06:40:11	PE	HAND	HAND DIP	YES	No
9	1	06:40:18	PE	HAND	HAND DIP	YES	No
9	1	06:40:22	PE	HAND	HAND DIP	YES	No
9	1	06:40:40	PE	STICK	STICK DIP	NO	No
9	1	06:40:53	PE	STICK	STICK DIP	NO	No
9	1	06:41:09	PE	STICK	STICK DIP	YES	No
10	1	06:57:59	FK	WOOD WOOL	retrieve	UNKNOWN	No
10	1	06:58:52	FK	STICK	STICK DIP	UNKNOWN	No
10	1	06:59:14	FK	STICK	STICK DIP	NO	No
10	1	06:59:59	FK	STICK	STICK DIP	NO	No
10	1	07:00:06	FK	STICK	STICK DIP	NO	No
10	1	07:00:33	FK	STICK	STICK DIP	NO	No
10	1	07:01:51	FK	STICK	STICK DIP	NO	No
10	1	07:02:57	FK	STICK	STICK DIP	NO	No
10	1	07:04:50	KL	STICK	STICK DIP	YES	No
10	1	07:05:11	KL	STICK	STICK DIP	NO	No
10	1	07:05:30	KL	STICK	STICK DIP	YES	No
10	1	07:05:48	KL	STICK	STICK DIP	YES	No
10	1	07:06:01	KL	HAND	HAND DIP	YES	No
10	1	07:06:39	KL	STICK	STICK DIP	NO	No
10	1	07:06:58	KL	STICK	STICK DIP	YES	No
10	1	07:07:03	KL	STICK	STICK DIP	YES	No
10	1	07:07:08	KL	STICK	STICK DIP	YES	No
10	1	07:07:14	KL	STICK	STICK DIP	YES	No
10	1	07:07:19	KL	STICK	STICK DIP	YES	No
10	1	07:07:26	KL	STICK	STICK DIP	YES	No
10	1	07:07:29	KL	STICK	STICK DIP	YES	No
10	1	07:07:45	KL	STICK	STICK DIP	YES	No
10	1	07:07:54	KL	STICK	STICK DIP	YES	No
10	1	07:08:02	KL	STICK	STICK DIP	YES	No
10	1	07:08:10	KL	STICK	STICK DIP	YES	No
10	1	07:09:22	KL	LEAFYSTICK	STICK DIP	YES	Yes
10	1	07:09:28	KL	LEAFYSTICK	STICK DIP	YES	Yes
10	1	07:09:35	KL	LEAFYSTICK	STICK DIP	YES	Yes
10	1	07:09:41	KL	LEAFYSTICK	STICK DIP	YES	Yes
10	1	07:09:50	KL	LEAFYSTICK	STICK DIP	YES	Yes
10	1	07:10:06	KL	STICK	STICK DIP	NO	No
10	1	07:10:17	KL	STICK	STICK DIP	YES	No
10	1	07:12:10	KL	LEAFYSTICK	STICK DIP	YES	Yes
10	1	07:12:17	KL	LEAFYSTICK	STICK DIP	YES	Yes
10	1	07:12:28	KL	STICK	STICK DIP	NO	No
10	1	07:19:58	EV	STICK	STICK DIP	YES	No
10	1	07:20:07	EV	STICK	STICK DIP	YES	No
10	1	07:20:37	EV	STICK	STICK DIP	NO	No
10	1	07:23:55	ED	STICK	STICK DIP	YES	No
10	1	07:24:09	ED	HAND	HAND DIP	YES	No
10	1	07:44:23	KL	HAND	HAND DIP	NO	No
10	1	07:44:27	KL	STICK	STICK DIP	YES	No
10	1	07:44:45	KL	STICK	STICK DIP	YES	No
10	1	07:44:54	KL	STICK	STICK DIP	YES	No
10	1	07:45:17	KL	STICK	STICK DIP	YES	No
10	1	07:45:28	KL	STICK	STICK DIP	YES	No
10	1	07:45:36	KL	STICK	STICK DIP	YES	No
10	1	07:45:40	KL	STICK	STICK DIP	YES	No
10	1	07:45:50	KL	STICK	STICK DIP	NO	No
10	1	07:45:59	KL	LEAFYSTICK	STICK DIP	NO	Yes
10	1	07:46:04	KL	HAND	HAND DIP	NO	No
10	1	07:46:16	KL	STICK	STICK DIP	YES	No
10	1	07:46:57	KL	HAND	HAND DIP	NO	No
10	1	07:47:02	KL	STICK	STICK DIP	NO	No
11	2	07:48:39	RE	HAND	HAND DIP	NO	No
11	2	07:48:44	RE	STICK	STICK DIP	NO	No
11	2	07:48:51	PE	HAND	HAND DIP	NO	No
11	2	07:49:00	PE	STICK	STICK DIP	NO	No
11	2	07:49:09	PE	STICK	STICK DIP	NO	No
11	2	07:49:17	PE	STICK	STICK DIP	NO	No
11	2	07:49:23	KL	STICK	STICK DIP	NO	No
11	2	07:49:28	PE	STICK	STICK DIP	NO	No
11	2	07:49:49	KL	STICK	STICK DIP	NO	No
11	2	07:49:58	KL	STICK	STICK DIP	NO	No
11	2	07:50:04	KL	STICK	STICK DIP	YES	No
11	2	07:50:15	KL	STICK	STICK DIP	YES	No
11	2	07:50:16	EM	STICK	STICK DIP	NO	No
11	2	07:50:18	KL	HAND	HAND DIP	NO	No
11	2	07:50:22	EM	HAND	HAND DIP	NO	No
11	2	07:50:32	KL	STICK	STICK DIP	NO	No
11	2	07:50:39	KL	HAND	HAND DIP	NO	No
11	2	07:50:44	LO	STICK	STICK DIP	NO	No
11	2	07:50:46	KL	STICK	STICK DIP	YES	No
11	2	07:51:05	LO	STICK	STICK DIP	NO	No
11	2	07:51:20	LO	STICK	STICK DIP	NO	No
11	2	07:51:26	LO	STICK	STICK DIP	NO	No
11	2	07:51:32	LO	STICK	STICK DIP	NO	No
11	2	07:51:44	LO	STICK	STICK DIP	NO	No
11	2	07:51:55	LO	STICK	STICK DIP	NO	No
11	2	07:52:07	LO	STICK	STICK DIP	NO	No
11	2	07:52:11	LO	STICK	STICK DIP	NO	No
11	2	07:52:26	LO	STICK	STICK DIP	NO	No
11	2	07:52:44	LO	STICK	STICK DIP	NO	No
11	2	07:52:53	LO	STICK	STICK DIP	NO	No
11	2	07:53:22	LO	STICK	STICK DIP	NO	No
11	2	07:56:05	EM	STICK	STICK DIP	NO	No
11	2	07:56:13	EM	STICK	STICK DIP	NO	No
11	2	07:56:28	EM	STICK	STICK DIP	NO	No
11	2	07:57:52	KL	HAND	HAND DIP	NO	No
11	2	07:58:01	KL	STICK	STICK DIP	NO	No
11	2	07:58:17	KL	STICK	STICK DIP	NO	No
11	2	07:58:26	KL	STICK	STICK DIP	NO	No
11	2	07:58:36	KL	STICK	STICK DIP	NO	No
11	2	07:58:48	KL	STICK	STICK DIP	YES	No
11	2	07:59:06	KL	STICK	STICK DIP	UNKNOWN	No
11	2	07:59:14	KL	STICK	STICK DIP	NO	No
11	2	08:00:00	EV	HAND	FISH	NO	No
11	2	08:00:52	KL	STICK	STICK DIP	NO	No
11	2	08:01:27	KL	STICK	STICK DIP	NO	No
11	2	08:01:59	KL	STICK	STICK DIP	NO	No
11	2	08:02:25	KL	STICK	STICK DIP	NO	No
11	2	08:02:48	KL	HAND	HAND DIP	NO	No
11	2	08:03:19	RE	HAND	FISH	YES	No
11	2	08:03:34	PE	STICK	STICK DIP	NO	No
11	2	08:03:40	RE	STICK	STICK DROP	NO	Yes
11	2	08:04:00	PE	STICK	STICK DIP	NO	No
11	2	08:04:07	PE	HAND	FISH	NO	No
11	2	08:04:16	PE	STICK	STICK DIP	NO	No
11	2	08:04:39	PE	STICK	STICK DIP	NO	No
11	2	08:04:52	PE	STICK	STICK DIP	NO	No
11	2	08:05:22	PE	STICK	STICK DIP	NO	No
11	2	08:05:23	PE	STICK	STICK DIP	NO	No
11	2	08:05:29	PE	STICK	STICK DIP	NO	No
11	2	08:05:49	PE	STICK	STICK DIP	NO	No
11	2	08:05:54	PE	STICK	STICK DIP	NO	No
11	2	08:06:00	PE	HAND	FISH	YES	No
11	2	08:06:37	PE	STICK	STICK DIP	NO	No
11	2	08:06:44	PE	HAND	HAND DIP	NO	No
11	2	08:07:06	PE	STICK	STICK DIP	NO	No
11	2	08:07:17	PE	HAND	HAND DIP	NO	No
11	2	08:16:57	PE	STICK	STICK DIP	NO	No
11	2	08:17:17	PE	STICK	STICK DIP	NO	No
11	2	08:17:22	PE	STICK	STICK DIP	NO	No
11	2	08:17:40	PE	STICK	STICK DIP	YES	No
11	2	08:19:39	ED	STICK	STICK DIP	NO	No
11	2	08:19:49	ED	STICK	STICK DIP	NO	No
11	2	08:19:58	ED	STICK	STICK DIP	NO	No
11	2	08:20:21	ED	STICK	STICK DIP	NO	No
11	2	08:20:28	ED	STICK	STICK DIP	NO	No
11	2	08:20:34	ED	STICK	STICK DIP	NO	No
11	2	08:20:40	ED	STICK	STICK DIP	NO	No
11	2	08:20:46	ED	STICK	STICK DIP	NO	No
11	2	08:20:56	ED	STICK	STICK DIP	NO	No
11	2	08:21:01	ED	STICK	STICK DIP	NO	No
11	2	08:21:08	ED	STICK	STICK DIP	NO	No
11	2	08:21:15	ED	STICK	STICK DIP	NO	No
11	2	08:21:25	ED	STICK	STICK DIP	NO	No
11	2	08:21:30	ED	STICK	STICK DIP	NO	No
11	2	08:21:41	ED	STICK	STICK DIP	NO	No
11	2	08:22:35	ED	STICK	STICK DIP	NO	No
11	2	08:22:45	ED	STICK	STICK DIP	NO	No
11	2	08:22:52	ED	STICK	STICK DIP	NO	No
11	2	08:23:07	ED	STICK	STICK DIP	NO	No
11	2	08:23:19	ED	STICK	STICK DROP	YES	Yes
11	2	08:23:41	ED	STICK	STICK DIP	YES	No
11	2	08:23:50	ED	HAND	HAND DIP	NO	No
11	2	08:24:20	ED	LEAFYSTICK	STICK DIP	YES	Yes
11	2	08:24:30	ED	LEAFYSTICK	STICK DIP	YES	Yes
11	2	08:24:47	ED	LEAFYSTICK	STICK DIP	NO	Yes
11	2	08:24:57	ED	LEAFYSTICK	STICK DIP	NO	Yes
11	2	08:25:06	ED	LEAFYSTICK	STICK DIP	NO	Yes
11	2	08:25:12	ED	STICK	STICK DIP	NO	No
11	2	08:25:50	FK	STICK	STICK DIP	NO	No
11	2	08:26:06	FK	HAND	HAND DIP	NO	No
11	2	08:26:35	FK	STICK	STICK DIP	NO	No
11	2	08:26:43	FK	STICK	STICK DIP	NO	No
11	2	08:27:10	FK	STICK	STICK DIP	NO	No
11	2	08:27:18	FK	STICK	STICK DIP	NO	No
11	2	08:27:27	FK	STICK	STICK DIP	NO	No
11	2	08:27:50	FK	STICK	STICK DIP	NO	No
11	2	08:27:57	FK	HAND	HAND DIP	NO	No
11	2	08:29:49	FK	HAND	HAND DIP	NO	No
11	2	08:30:02	FK	STICK	STICK DIP	NO	No
11	2	08:30:07	FK	HAND	HAND DIP	NO	No
11	2	08:30:17	FK	STICK	STICK DIP	NO	No
11	2	08:32:24	FK	STICK	STICK DIP	NO	No
11	2	08:33:06	FK	STICK	STICK DIP	NO	No
11	2	08:34:48	RE	HAND	HAND DIP	NO	No
11	2	08:35:42	RE	HAND	HAND DIP	NO	No
11	2	08:36:04	RE	HAND	HAND DIP	NO	No
11	2	08:36:07	RE	STICK	STICK DIP	NO	No
12	2	08:40:57	EM	STICK	STICK DIP	NO	No
12	2	08:41:06	EM	HAND	HAND DIP	NO	No
12	2	08:42:23	QA	LEAFYSTICK	STICK DIP	NO	Yes
12	2	08:42:56	KL	STICK	STICK DIP	YES	No
12	2	08:43:08	KL	STICK	STICK DIP	UNKNOWN	No
12	2	08:43:29	KL	LEAFYSTICK	STICK DIP	YES	Yes
12	2	08:43:35	KL	LEAFYSTICK	STICK DIP	YES	Yes
12	2	08:43:39	KL	LEAFYSTICK	STICK DIP	YES	Yes
12	2	08:43:45	KL	LEAFYSTICK	STICK DIP	YES	Yes
12	2	08:43:54	KL	STICK	STICK DIP	NO	No
12	2	08:44:05	KL	LEAFYSTICK	STICK DIP	YES	Yes
12	2	08:44:22	KL	LEAFYSTICK	STICK DIP	YES	Yes
12	2	08:44:29	KL	LEAFYSTICK	STICK DIP	YES	Yes
12	2	08:44:54	KL	LEAFYSTICK	STICK DIP	NO	Yes
12	2	08:45:00	KL	LEAFYSTICK	STICK DIP	NO	Yes
12	2	08:45:12	EM	LEAFYSTICK	STICK DIP	NO	Yes
12	2	08:45:18	EM	LEAFYSTICK	STICK DIP	NO	Yes
12	2	08:45:28	EM	STICK	STICK DIP	NO	No
12	2	08:47:45	PE	LEAFYSTICK	STICK DIP	NO	Yes
12	2	08:47:54	PE	LEAFYSTICK	STICK DIP	YES	Yes
12	2	08:48:00	PE	LEAFYSTICK	STICK DIP	YES	Yes
12	2	08:48:05	PE	LEAFYSTICK	STICK DIP	YES	Yes
12	2	08:48:09	PE	LEAFYSTICK	STICK DIP	YES	Yes
12	2	08:48:11	PE	LEAFYSTICK	STICK DIP	YES	Yes
12	2	08:48:15	PE	LEAFYSTICK	STICK DIP	YES	Yes
12	2	08:48:20	PE	LEAFYSTICK	STICK DIP	YES	Yes
12	2	08:48:26	PE	LEAFYSTICK	STICK DIP	YES	Yes
12	2	08:48:38	PE	LEAFYSTICK	STICK DIP	NO	Yes
12	2	08:48:52	PE	STICK	STICK DIP	NO	No
12	2	08:49:01	PE	STICK	STICK DIP	NO	No
12	2	08:49:14	PE	STICK	STICK DIP	NO	No
12	2	08:49:24	PE	HAND	FISH	YES	No
12	2	08:49:45	PE	LEAFYSTICK	STICK DIP	NO	Yes
12	2	08:49:49	PE	HAND	FISH	NO	No
12	2	08:50:31	EM	STICK	STICK DIP	NO	No
12	2	08:50:37	EM	STICK	STICK DIP	YES	No
12	2	08:51:14	EM	STICK	STICK DIP	NO	No
12	2	08:51:21	EM	STICK	STICK DIP	NO	No
12	2	08:51:44	EM	STICK	STICK DIP	NO	No
12	2	08:52:03	EM	STICK	STICK DIP	NO	No
12	2	08:52:21	EM	STICK	STICK DIP	NO	No
12	2	08:52:34	EM	STICK	STICK DIP	NO	No
12	2	08:52:46	EM	STICK	STICK DIP	NO	No
12	2	08:53:04	EM	STICK	STICK DIP	NO	No
12	2	08:53:12	EM	STICK	STICK DIP	NO	No
12	2	08:57:47	EM	HAND	HAND DIP	NO	No
12	2	08:58:00	EM	STICK	STICK DIP	NO	No
12	2	08:58:04	EM	STICK	STICK DIP	NO	No
12	2	08:58:12	EM	STICK	STICK DIP	NO	No
12	2	08:59:05	EM	LEAFYSTICK	STICK DIP	YES	Yes
12	2	09:00:09	EM	LEAFYSTICK	STICK DIP	NO	Yes
12	2	09:01:33	EM	LEAFYSTICK	STICK DIP	YES	Yes
12	2	09:05:29	ED	LEAFYSTICK	STICK DIP	YES	Yes
12	2	09:05:33	ED	LEAFYSTICK	STICK DIP	YES	Yes
12	2	09:05:37	ED	LEAFYSTICK	STICK DIP	YES	Yes
12	2	09:05:40	ED	LEAFYSTICK	STICK DIP	YES	Yes
12	2	09:05:45	ED	LEAFYSTICK	STICK DIP	YES	Yes
12	2	09:05:48	ED	LEAFYSTICK	STICK DIP	YES	Yes
12	2	09:05:50	ED	LEAFYSTICK	STICK DIP	YES	Yes
12	2	09:05:52	ED	LEAFYSTICK	STICK DIP	YES	Yes
12	2	09:06:03	ED	STICK	STICK DIP	NO	No
12	2	09:06:25	ED	LEAFYSTICK	STICK DIP	YES	Yes
12	2	09:07:10	ED	LEAFYSTICK	STICK DIP	YES	Yes
12	2	09:07:35	ED	LEAFYSTICK	STICK DIP	YES	Yes
12	2	09:07:58	ED	LEAFYSTICK	STICK DIP	UNKNOWN	Yes
12	2	09:08:03	ED	HAND	HAND DIP	NO	No
12	2	09:08:26	ED	LEAFYSTICK	STICK DIP	YES	Yes
12	2	09:08:54	ED	STICK	STICK DIP	NO	No
12	2	09:08:59	ED	STICK	STICK DIP	NO	No
12	2	09:09:06	ED	STICK	STICK DIP	NO	No
12	2	09:09:17	ED	STICK	STICK DIP	NO	No
12	2	09:09:35	ED	STICK	STICK DIP	NO	No
12	2	09:09:40	ED	STICK	STICK DIP	NO	No
12	2	09:10:14	ED	STICK	STICK DIP	NO	No
12	2	09:10:23	ED	STICK	STICK DIP	NO	No
12	2	09:10:33	ED	STICK	STICK DIP	NO	No
12	2	09:10:46	ED	LEAFYSTICK	STICK DIP	YES	Yes
12	2	09:11:30	ED	STICK	STICK DIP	NO	No
12	2	09:11:46	ED	HAND	HAND DIP	NO	No
12	2	09:12:13	ED	LEAFYSTICK	STICK DIP	YES	Yes
12	2	09:12:38	ED	STICK	STICK DIP	NO	No
12	2	09:12:42	ED	STICK	STICK DIP	NO	No
12	2	09:13:18	ED	STICK	STICK DIP	NO	No
12	2	09:13:30	ED	STICK	STICK DIP	NO	No
12	2	09:13:37	ED	STICK	STICK DIP	NO	No
12	2	09:14:16	ED	LEAFYSTICK	STICK DIP	YES	Yes
12	2	09:14:43	ED	LEAFYSTICK	STICK DIP	YES	Yes
12	2	09:14:56	ED	HAND	HAND DIP	NO	No
12	2	09:15:17	ED	STICK	STICK DIP	NO	No
12	2	09:15:29	ED	STICK	STICK DIP	NO	No
12	2	09:16:02	ED	LEAFYSTICK	STICK DIP	YES	Yes
12	2	09:16:28	ED	LEAFYSTICK	STICK DIP	YES	Yes
12	2	09:17:26	ED	LEAFYSTICK	STICK DIP	YES	Yes
12	2	09:17:37	ED	LEAFYSTICK	STICK DIP	YES	Yes
12	2	09:17:41	ED	LEAFYSTICK	STICK DIP	YES	Yes
12	2	09:17:44	ED	LEAFYSTICK	STICK DIP	YES	Yes
12	2	09:17:49	ED	LEAFYSTICK	STICK DIP	YES	Yes
12	2	09:17:53	ED	LEAFYSTICK	STICK DIP	YES	Yes
12	2	09:17:56	ED	LEAFYSTICK	STICK DIP	YES	Yes
12	2	09:17:59	ED	LEAFYSTICK	STICK DIP	YES	Yes
12	2	09:18:02	ED	LEAFYSTICK	STICK DIP	YES	Yes
12	2	09:18:05	ED	LEAFYSTICK	STICK DIP	YES	Yes
12	2	09:18:08	ED	LEAFYSTICK	STICK DIP	YES	Yes
12	2	09:18:10	ED	LEAFYSTICK	STICK DIP	YES	Yes
12	2	09:18:13	ED	LEAFYSTICK	STICK DIP	YES	Yes
12	2	09:18:16	ED	LEAFYSTICK	STICK DIP	YES	Yes
12	2	09:18:19	ED	LEAFYSTICK	STICK DIP	YES	Yes
12	2	09:18:23	ED	LEAFYSTICK	STICK DIP	YES	Yes
12	2	09:18:25	ED	LEAFYSTICK	STICK DIP	YES	Yes
12	2	09:18:29	ED	LEAFYSTICK	STICK DIP	YES	Yes
12	2	09:18:31	ED	LEAFYSTICK	STICK DIP	YES	Yes
12	2	09:18:34	ED	LEAFYSTICK	STICK DIP	YES	Yes
12	2	09:18:38	ED	LEAFYSTICK	STICK DIP	YES	Yes
12	2	09:18:41	ED	LEAFYSTICK	STICK DIP	YES	Yes
12	2	09:18:42	ED	LEAFYSTICK	STICK DIP	YES	Yes
12	2	09:18:45	ED	LEAFYSTICK	STICK DIP	YES	Yes
12	2	09:18:51	ED	LEAFYSTICK	STICK DIP	YES	Yes
12	2	09:18:53	ED	LEAFYSTICK	STICK DIP	YES	Yes
12	2	09:18:56	ED	LEAFYSTICK	STICK DIP	YES	Yes
12	2	09:18:58	ED	LEAFYSTICK	STICK DIP	YES	Yes
12	2	09:19:00	ED	LEAFYSTICK	STICK DIP	YES	Yes
12	2	09:19:05	ED	LEAFYSTICK	STICK DIP	YES	Yes
12	2	09:19:07	ED	LEAFYSTICK	STICK DIP	YES	Yes
12	2	09:19:09	ED	LEAFYSTICK	STICK DIP	YES	Yes
12	2	09:19:12	ED	LEAFYSTICK	STICK DIP	YES	Yes
12	2	09:19:15	ED	LEAFYSTICK	STICK DIP	YES	Yes
12	2	09:19:18	ED	LEAFYSTICK	STICK DIP	YES	Yes
12	2	09:19:19	ED	LEAFYSTICK	STICK DIP	YES	Yes
12	2	09:19:22	ED	LEAFYSTICK	STICK DIP	YES	Yes
12	2	09:19:24	ED	LEAFYSTICK	STICK DIP	YES	Yes
12	2	09:19:26	ED	LEAFYSTICK	STICK DIP	YES	Yes
13	2	09:30:04	EM	HAND	HAND DIP	NO	No
13	2	09:30:17	EM	STICK	STICK DIP	NO	No
13	2	09:30:28	EM	STICK	STICK DIP	NO	No
13	2	09:30:39	EM	STICK	STICK DIP	NO	No
13	2	09:30:55	EM	HAND	HAND DIP	NO	No
13	2	09:32:06	EM	STICK	STICK DIP	NO	No
13	2	09:32:09	EM	STICK	STICK DIP	NO	No
13	2	09:32:16	EM	STICK	STICK DIP	NO	No
13	2	09:32:23	EM	STICK	STICK DIP	NO	No
13	2	09:32:28	EM	STICK	STICK DIP	NO	No
13	2	09:32:34	EM	STICK	STICK DIP	NO	No
13	2	09:32:53	EM	STICK	STICK DIP	NO	No
13	2	09:33:04	EM	STICK	STICK DIP	YES	No
13	2	09:33:57	LU	STICK	STICK DIP	NO	No
13	2	09:34:07	LU	STICK	STICK DIP	YES	No
13	2	09:36:06	EM	STICK	STICK DIP	NO	No
13	2	09:41:21	ED	STICK	retrieve	YES	No
13	2	09:51:26	ED	STICK	STICK DIP	NO	No
13	2	09:52:13	ED	STICK	STICK DIP	NO	No
13	2	09:52:25	ED	LEAFYSTICK	STICK DIP	YES	Yes
13	2	09:52:34	ED	LEAFYSTICK	STICK DIP	YES	Yes
13	2	09:52:40	ED	STICK	STICK DIP	NO	No
13	2	09:52:52	ED	STICK	STICK DIP	NO	No
13	2	09:52:58	ED	STICK	STICK DIP	YES	No
13	2	09:53:24	ED	STICK	STICK DIP	NO	No
13	2	09:53:35	ED	STICK	STICK DIP	NO	No
13	2	09:54:40	ED	STICK	STICK DIP	NO	No
13	2	09:55:05	ED	STICK	STICK DIP	NO	No
13	2	09:55:15	ED	LEAFYSTICK	STICK DIP	NO	Yes
13	2	10:00:02	ED	STICK	STICK DIP	NO	No
14	2	10:17:38	PE	STICK	STICK DIP	NO	No
14	2	10:17:52	PE	STICK	STICK DIP	NO	No
14	2	10:17:56	PE	HAND	HAND DIP	NO	No
14	2	10:18:03	PE	STICK	STICK DIP	NO	No
14	2	10:18:31	EV	HAND	HAND DIP	NO	No
14	2	10:18:46	PE	STICK	STICK DIP	NO	No
14	2	10:19:28	EV	HAND	HAND DIP	NO	No
14	2	10:20:17	EV	STICK	STICK DIP	NO	No
14	2	10:20:26	EV	STICK	STICK DIP	NO	No
14	2	10:21:20	PE	STICK	STICK DIP	NO	No
14	2	10:21:40	PE	STICK	STICK DIP	NO	No
14	2	10:21:58	PE	STICK	STICK DIP	NO	No
14	2	10:22:09	PE	STICK	STICK DIP	NO	No
14	2	10:22:18	PE	STICK	STICK DIP	NO	No
14	2	10:22:34	PE	STICK	STICK DIP	NO	No
14	2	10:22:56	PE	STICK	STICK DIP	NO	No
14	2	10:23:05	PE	STICK	STICK DIP	NO	No
14	2	10:23:15	PE	STICK	STICK DIP	NO	No
14	2	10:23:44	PE	HAND	HAND DIP	NO	No
14	2	10:25:33	FK	HAND	HAND DIP	NO	No
14	2	10:26:18	ED	STICK	STICK DIP	NO	No
14	2	10:26:38	ED	LEAFYSTICK	STICK DIP	NO	Yes
14	2	10:27:17	FK	HAND	HAND DIP	NO	No
14	2	10:28:12	ED	LEAFYSTICK	STICK DIP	NO	Yes
14	2	10:29:45	PE	STICK	STICK DIP	NO	No
14	2	10:29:58	PE	STICK	STICK DIP	NO	No
14	2	10:30:17	PE	STICK	STICK DIP	NO	No
14	2	10:30:24	PE	HAND	HAND DIP	NO	No
14	2	10:30:36	PE	STICK	STICK DIP	NO	No
14	2	10:30:48	PE	STICK	STICK DROP	YES	Yes
14	2	10:31:03	PE	STICK	STICK DIP	YES	No
14	2	10:31:05	PE	STICK	STICK DIP	YES	No
14	2	10:31:07	PE	STICK	STICK DIP	YES	No
14	2	10:31:10	PE	STICK	STICK DIP	YES	No
14	2	10:31:13	PE	STICK	STICK DIP	YES	No
14	2	10:31:15	PE	STICK	STICK DIP	YES	No
14	2	10:31:17	PE	STICK	STICK DIP	YES	No
14	2	10:31:20	PE	STICK	STICK DIP	YES	No
14	2	10:31:22	PE	STICK	STICK DIP	YES	No
14	2	10:31:24	PE	STICK	STICK DIP	YES	No
14	2	10:31:29	PE	STICK	STICK DIP	NO	No
14	2	10:31:50	PE	STICK	STICK DIP	NO	No
14	2	10:32:33	PE	STICK	STICK DIP	NO	No
14	2	10:32:44	PE	STICK	STICK DIP	NO	No
14	2	10:34:04	ED	LEAFYSTICK	STICK DIP	YES	Yes
14	2	10:34:29	ED	STICK	STICK DIP	NO	No
14	2	10:34:35	ED	STICK	STICK DIP	NO	No
14	2	10:34:53	ED	LEAFYSTICK	STICK DIP	NO	Yes
14	2	10:35:10	ED	STICK	STICK DIP	NO	No
14	2	10:35:26	ED	STICK	STICK DIP	NO	No
14	2	10:35:45	ED	STICK	STICK DIP	NO	No
14	2	10:35:49	ED	STICK	STICK DIP	NO	No
14	2	10:36:10	ED	STICK	STICK DIP	NO	No
14	2	10:36:20	ED	STICK	STICK DIP	NO	No
14	2	10:36:42	ED	STICK	STICK DIP	NO	No
14	2	10:37:20	ED	STICK	STICK DIP	NO	No
14	2	10:37:28	ED	STICK	STICK DIP	NO	No
14	2	10:37:47	ED	STICK	STICK DIP	NO	No
14	2	10:37:55	ED	STICK	STICK DIP	NO	No
14	2	10:38:19	ED	STICK	STICK DIP	NO	No
14	2	10:38:29	ED	STICK	STICK DIP	NO	No
14	2	10:38:42	ED	STICK	STICK DIP	NO	No
14	2	10:39:11	ED	STICK	STICK DIP	NO	No
14	2	10:39:24	ED	STICK	STICK DIP	NO	No
14	2	10:39:43	ED	STICK	STICK DIP	NO	No
14	2	10:39:56	ED	LEAFYSTICK	STICK DIP	YES	Yes
14	2	10:40:11	ED	LEAFYSTICK	STICK DIP	YES	Yes
14	2	10:40:33	ED	STICK	STICK DIP	NO	No
14	2	10:41:08	ED	STICK	STICK DIP	NO	No
14	2	10:41:25	ED	STICK	STICK DIP	NO	No
14	2	10:41:30	ED	STICK	STICK DIP	NO	No
14	2	10:41:40	ED	STICK	STICK DIP	NO	No
14	2	10:41:50	ED	STICK	STICK DIP	NO	No
14	2	10:42:13	ED	STICK	STICK DIP	NO	No
14	2	10:42:21	ED	STICK	STICK DIP	NO	No
14	2	10:42:36	ED	STICK	STICK DIP	NO	No
14	2	10:42:42	ED	STICK	STICK DIP	NO	No
14	2	10:42:55	ED	STICK	STICK DIP	NO	No
14	2	10:43:14	ED	STICK	STICK DIP	NO	No
14	2	10:43:22	ED	STICK	STICK DIP	NO	No
14	2	10:43:38	ED	LEAFYSTICK	STICK DIP	YES	Yes
14	2	10:43:43	ED	LEAFYSTICK	STICK DIP	YES	Yes
14	2	10:43:46	ED	LEAFYSTICK	STICK DIP	YES	Yes
14	2	10:43:49	ED	LEAFYSTICK	STICK DIP	YES	Yes
14	2	10:43:59	ED	HAND	FISH	YES	No
14	2	10:44:14	ED	STICK	STICK DIP	YES	No
14	2	10:44:21	ED	STICK	STICK DIP	YES	No
14	2	10:44:28	ED	LEAFYSTICK	STICK DIP	YES	Yes
14	2	10:44:52	ED	STICK	STICK DIP	NO	No
14	2	10:45:12	ED	STICK	STICK DIP	NO	No
14	2	10:45:30	ED	STICK	STICK DIP	NO	No
14	2	10:45:51	ED	LEAFYSTICK	STICK DIP	YES	Yes
14	2	10:46:00	ED	LEAFYSTICK	STICK DIP	YES	Yes
14	2	10:46:03	ED	LEAFYSTICK	STICK DIP	YES	Yes
14	2	10:46:05	ED	LEAFYSTICK	STICK DIP	YES	Yes
14	2	10:46:10	ED	LEAFYSTICK	STICK DIP	YES	Yes
14	2	10:46:13	ED	LEAFYSTICK	STICK DIP	YES	Yes
14	2	10:46:18	ED	LEAFYSTICK	STICK DIP	NO	Yes
14	2	10:46:37	ED	LEAFYSTICK	STICK DIP	YES	Yes
14	2	10:46:39	ED	LEAFYSTICK	STICK DIP	YES	Yes
14	2	10:46:43	ED	LEAFYSTICK	STICK DIP	YES	Yes
14	2	10:46:45	ED	LEAFYSTICK	STICK DIP	YES	Yes
14	2	10:46:49	ED	LEAFYSTICK	STICK DIP	YES	Yes
14	2	10:46:53	ED	LEAFYSTICK	STICK DIP	YES	Yes
14	2	10:46:57	ED	LEAFYSTICK	STICK DIP	YES	Yes
14	2	10:47:02	ED	LEAFYSTICK	STICK DIP	YES	Yes
14	2	10:47:08	ED	LEAFYSTICK	STICK DIP	YES	Yes
14	2	10:47:12	ED	LEAFYSTICK	STICK DIP	YES	Yes
14	2	10:47:15	ED	LEAFYSTICK	STICK DIP	YES	Yes
14	2	10:47:20	ED	LEAFYSTICK	STICK DIP	YES	Yes
14	2	10:47:23	ED	LEAFYSTICK	STICK DIP	YES	Yes
14	2	10:47:28	ED	LEAFYSTICK	STICK DIP	YES	Yes
14	2	10:47:32	ED	LEAFYSTICK	STICK DIP	YES	Yes
14	2	10:47:35	ED	LEAFYSTICK	STICK DIP	YES	Yes
14	2	10:47:39	ED	LEAFYSTICK	STICK DIP	YES	Yes
14	2	10:47:43	ED	LEAFYSTICK	STICK DIP	YES	Yes
14	2	10:47:49	ED	LEAFYSTICK	STICK DIP	YES	Yes
14	2	10:47:54	ED	LEAFYSTICK	STICK DIP	YES	Yes
14	2	10:48:07	ED	LEAFYSTICK	STICK DIP	YES	Yes
14	2	10:48:11	ED	LEAFYSTICK	STICK DIP	YES	Yes
14	2	10:48:14	ED	LEAFYSTICK	STICK DIP	YES	Yes
14	2	10:48:19	ED	LEAFYSTICK	STICK DIP	YES	Yes
14	2	10:48:38	ED	LEAFYSTICK	STICK DIP	YES	Yes
14	2	10:49:06	ED	LEAFYSTICK	STICK DIP	YES	Yes
14	2	10:49:16	ED	STICK	STICK DIP	NO	No
14	2	10:49:26	ED	LEAFYSTICK	STICK DIP	YES	Yes
14	2	10:49:30	ED	LEAFYSTICK	STICK DIP	YES	Yes
14	2	10:49:35	ED	LEAFYSTICK	STICK DIP	YES	Yes
14	2	10:49:40	ED	LEAFYSTICK	STICK DIP	YES	Yes
14	2	10:49:44	ED	LEAFYSTICK	STICK DIP	YES	Yes
14	2	10:49:47	ED	LEAFYSTICK	STICK DIP	YES	Yes
14	2	10:49:52	ED	LEAFYSTICK	STICK DIP	YES	Yes
14	2	10:49:55	ED	LEAFYSTICK	STICK DIP	YES	Yes
14	2	10:50:00	ED	LEAFYSTICK	STICK DIP	YES	Yes
14	2	10:50:11	ED	STICK	STICK DIP	NO	No
14	2	10:50:52	ED	LEAFYSTICK	STICK DIP	YES	Yes
14	2	10:51:01	ED	LEAFYSTICK	STICK DIP	YES	Yes
14	2	10:51:05	ED	LEAFYSTICK	STICK DIP	YES	Yes
14	2	10:51:10	ED	LEAFYSTICK	STICK DIP	YES	Yes
14	2	10:51:12	ED	LEAFYSTICK	STICK DIP	YES	Yes
14	2	10:51:17	ED	LEAFYSTICK	STICK DIP	YES	Yes
14	2	10:51:20	ED	LEAFYSTICK	STICK DIP	YES	Yes
14	2	10:51:24	ED	LEAFYSTICK	STICK DIP	YES	Yes
14	2	10:52:03	ED	LEAFYSTICK	STICK DIP	YES	Yes
14	2	10:52:12	ED	LEAFYSTICK	STICK DIP	YES	Yes
14	2	10:52:22	ED	LEAFYSTICK	STICK DIP	YES	Yes
14	2	10:52:27	ED	LEAFYSTICK	STICK DIP	YES	Yes
14	2	10:52:32	ED	LEAFYSTICK	STICK DIP	YES	Yes
14	2	10:52:48	ED	LEAFYSTICK	STICK DIP	YES	Yes
14	2	10:52:52	ED	LEAFYSTICK	STICK DIP	YES	Yes
14	2	10:52:55	ED	LEAFYSTICK	STICK DIP	YES	Yes
14	2	10:52:59	ED	LEAFYSTICK	STICK DIP	YES	Yes
14	2	10:53:18	ED	LEAFYSTICK	STICK DIP	YES	Yes
14	2	10:53:23	ED	LEAFYSTICK	STICK DIP	YES	Yes
14	2	10:53:33	ED	LEAFYSTICK	STICK DIP	YES	Yes
14	2	10:53:39	ED	LEAFYSTICK	STICK DIP	YES	Yes
14	2	10:53:45	ED	LEAFYSTICK	STICK DIP	YES	Yes
14	2	10:53:50	ED	LEAFYSTICK	STICK DIP	YES	Yes
14	2	10:53:53	ED	LEAFYSTICK	STICK DIP	YES	Yes
14	2	10:53:56	ED	LEAFYSTICK	STICK DIP	YES	Yes
14	2	10:54:04	ED	LEAFYSTICK	STICK DIP	YES	Yes
14	2	10:54:17	ED	LEAFYSTICK	STICK DIP	YES	Yes
14	2	10:54:30	ED	LEAFYSTICK	STICK DIP	YES	Yes
14	2	10:54:35	ED	LEAFYSTICK	STICK DIP	YES	Yes
14	2	10:54:40	ED	LEAFYSTICK	STICK DIP	YES	Yes
14	2	10:54:44	ED	LEAFYSTICK	STICK DIP	YES	Yes
14	2	10:54:47	ED	LEAFYSTICK	STICK DIP	YES	Yes
14	2	10:54:49	ED	LEAFYSTICK	STICK DIP	YES	Yes
14	2	10:54:52	ED	LEAFYSTICK	STICK DIP	YES	Yes
14	2	10:54:54	ED	LEAFYSTICK	STICK DIP	YES	Yes
14	2	10:55:00	ED	LEAFYSTICK	STICK DIP	YES	Yes
14	2	10:55:04	ED	LEAFYSTICK	STICK DIP	YES	Yes
14	2	10:55:08	ED	LEAFYSTICK	STICK DIP	YES	Yes
14	2	10:55:13	ED	LEAFYSTICK	STICK DIP	YES	Yes
14	2	10:55:17	ED	LEAFYSTICK	STICK DIP	YES	Yes
14	2	10:55:22	ED	LEAFYSTICK	STICK DIP	YES	Yes
14	2	10:55:26	ED	LEAFYSTICK	STICK DIP	YES	Yes
14	2	10:55:29	ED	LEAFYSTICK	STICK DIP	YES	Yes
14	2	10:55:32	ED	LEAFYSTICK	STICK DIP	YES	Yes
14	2	10:55:34	ED	LEAFYSTICK	STICK DIP	YES	Yes
14	2	10:55:38	ED	LEAFYSTICK	STICK DIP	YES	Yes
14	2	10:55:41	ED	LEAFYSTICK	STICK DIP	YES	Yes
[truncated: 1,023 more rows]
